# Supplementary material
Source: PubMed Central journal article supplement (PMC10566430)
Supplement: NIHMS1933398-supplement-Supplementary_Material.pdf [file NIHMS1933398-supplement-Supplementary_Material.pdf]

# Supplementary Information (SI) for

## Genetic Underpinnings of Risky Behaviour Relate to Altered Neuroanatomy

### Table of Contents

#### Supplementary Methods

##### 1. Measures

###### 1.1. Main risky behaviour measure

###### 1.2 Control variables

###### 1.3 Imaging-derived Phenotypes (IDPs)

###### 1.3.1 T1 MRI Image Processing

###### 1.3.2 Region of interest (ROI)-level IDPs Processed by the UKB

###### 1.3.3 Additional ROI-level IDPs

###### 1.4 Polygenic Risk Score (PRS) for Risky behaviour

###### 1.5 Genetic Correlations of Risky behaviour

##### 2. Pre-registration of Analysis Plan and Unplanned Deviations

#### Supplementary Discussion

#### Supplementary Tables

#### Supplementary References

#### Supplementary Notes

##### BIG BEAR Consortium Members List

## Supplementary Methods

### 1. Measures

#### 1.1. Main risky behaviour measure

We closely follow the methods of ref 1 to derive a measure of risky behaviour based on participants' self-reports across the drinking, smoking, driving, and sexual domains.

Specifically, we use the following UK Biobank variables:

- Number of alcoholic drinks per week (Data-Fields: 1558, 1568, 1578, 1588, 1598, 1608, 5364, 4407, 4418, 4429, 4440, 4451, 4462)
- Ever smoking (Data-Field 20116, 1249, 1239)
- Frequency of driving faster than the motorway speed limit (Data-Field 1100)
- Lifetime number of sexual partners (Data-Field 2149)<sup>1</sup>

The full description of each Data-Field can be found in the online data showcase of the UKB (<http://biobank.ctsu.ox.ac.uk/crystal/search.cgi>). The annotated STATA code used to derive all behavioural phenotypes and control variables can be found in our pre-registered analysis plan (<https://osf.io/qkp4g/>).

All variables above were measured on at least one of 3 occasions: (1) the initial assessment visit, (2) the first repeat assessment visit, and (3) the imaging visit. Data from (2) and (3) are only available for a subset of the original sample. In cases where participants provided answers across more than one visit, we compute the average of their reports.

To obtain a measure that captures the common variance in risky behaviour shared across domains, we perform principal component analysis (PCA) on  $N = 315,855$  UKB participants and extract the first principal component (PC) as our main outcome of interest for this study (referred to as “risky behaviour”). Compared to experimental procedures that elicit risk tolerance, self-reported measures exhibit higher external validity and test-retest reliability<sup>3-5</sup>. Furthermore, by

---

<sup>1</sup> Self-reports of the number of sexual partners have been implicated in risky behaviours related to alcohol abuse (i.e., binge drinking) and unprotected sex, specifically in young adults <sup>2</sup>, irrespective of gender or sexual orientation.

extracting the first principal component of the four risky behaviours, we reduce measurement noise due to the aggregation of signals across various measures, while capturing behavioural tendencies across domains that are independent of idiosyncratic differences in the four specific behaviours. The PCA summary statistics are available in Supplementary Table 1, and the component loadings are available in Supplementary Table 2. The first PC explained about 37% of the variance in the different phenotypes of risky behaviours in the sample, and it was the only PC that positively loaded on all of four phenotypes. Data distribution was assumed to be normal but this was not formally tested.

While the GWAS by Linnér et al. (2019)<sup>1</sup>, was primarily based on a meta-analysis of two very crude, noisy, single-item measures of risk taking that were available in the two largest samples (UKB and 23andMe, which had slightly different questions on risk taking), this choice (in the GWAS) was made to maximize the sample size for genetic discovery, following the logic outlined in ref 6, i.e., that in genetic discovery studies, sample size typically trumps phenotypic accuracy in terms of statistical power. (The supplementary material of ref 6 includes a mathematical derivation that illustrates this). In the current work, we also wanted to maximize statistical power, albeit the situation here is different, as the sample size was exogenously determined by the UKB. Thus, the only means to increase statistical power was via increasing the quality of the phenotypic measurement. We decided to focus on the first PC of the four risky behaviours introduced in Linnér et al. (2019) for the following reasons: (1) It is available for a large part of the scanned subsample. (2) Linnér et al. (2019) showed that this first PC has a higher SNP-based heritability than any of the general risk-taking measures or individual phenotypes, which is partly because the first PC is less affected by random measurement error than any input variable considered separately. (3) The high heritability of the first PC suggests that similar genetic factors influence risk taking across various domains, making this a promising trait to study in connection with other biomarkers such as brain anatomy. (4) This variable has been studied in the literature, limiting our degrees of freedom for the current study. (5) GWAS results for this variable were readily available.<sup>6</sup>

## 1.2 Control Variables

All of our analyses systematically control for several genetic, socio-demographic and anthropometric factors that could potentially confound the observed associations [e.g. sex<sup>7</sup>, height<sup>8</sup> and genetic population structure<sup>9</sup>]. Specifically, we use the following control variables, as provided by the UKB:

- Age at the time of brain scan (Data-Field 21003)
- Birth year (Data-Field 33)
- Sex (self reported and genetically identified, Data-Fields 31 & 22001, dummy coded)
- Height (Data-Field 50)
- Handedness (Data-Field 1707, categorical variable: Right-handed, Left-handed, ambidextrous, N/A)
- Sex x birth year interactions (binned into fields containing at least 20 participants each)
- The first 40 PCs of the genetic data (Data-Field 22009)
- Total intracranial volume (TIV), derived using the CAT12 toolbox from T1 images.

We carry out an additional analysis that further controls for the following socio-economic and cognitive outcomes (provided by the UKB):

- Educational attainment (Data-Field 6138)
- A 13-item measure of fluid IQ (Data-Fields 20016 and 20191)
- Zip-code level measure of the Townsend social deprivation index (Data-Field 189)
- Household income (Data-Field 738)
- Number of household members (Data-Field 709)
- Place of birth, binned in 100 clusters based on North and East birth location coordinates (Data-Fields 129 and 130). Clusters were calculated using the *k*-means algorithm, which minimizes within-cluster variances (squared Euclidean distances) of  $k = 100$  clusters with 10,000 iterations after random seeding.

The empirical distributions of the main variables used in our main analysis and the correlations between them are depicted in Figure 1B and Extended Data Figure 1 and 2. Data distributions were assumed to be normal but this was not formally tested.

### 1.3 Imaging-derived Phenotypes (IDPs)

#### 1.3.1 T1 MRI Image Processing

Our voxel-level analysis uses T1-weighted structural brain MRI images in NIFTI format provided by the UKB (data field 20252). The images were acquired using 3-T Siemens Skyra scanners, with a 32-channel head coil (Siemens, Erlangen, Germany), with the following scanning parameters: repetition time = 2000 ms; echo time = 2.1 ms; flip angle = 8°; matrix size = 256 × 256 mm; voxel size = 1 × 1 × 1 mm; number of slices = 208.

We preprocessed the data using the Computational Anatomy Toolbox (CAT; [www.neuro.uni-jena.de/cat/](http://www.neuro.uni-jena.de/cat/)) for SPM ([www.fil.ion.ucl.ac.uk/spm/software/spm12/](http://www.fil.ion.ucl.ac.uk/spm/software/spm12/)), a fully automated toolbox for deriving neuroanatomical measurements at voxel and ROI levels. Image pre-processing used the default setting of CAT12 (accessible online at <http://www.neuro.uni-jena.de/cat12/CAT12-Manual.pdf>). Images were corrected for bias-field inhomogeneities, segmented into grey matter, white matter, and cerebrospinal fluid (CSF), spatially normalized to the MNI space using linear and non-linear transformations, and were modulated to preserve the total amount of signal in the original image during spatial normalization (the specific SPM-processing parameters can be found in the pre-registered document on OSF <https://osf.io/qkp4g/>). We applied spatial smoothing with 8-mm Full-Width-at-Half-Maximum (FWHM) Gaussian kernel for the segmented, modulated images for grey matter volume (GMV). Finally, to ensure that only voxels that likely contain grey matter enter the analyses, we constructed a brain mask based on the average of all GMV images. Specifically, following standard VBM procedures (see SPM/CAT12 <http://www.neuro.uni-jena.de/cat12/CAT12-Manual.pdf>) we thresholded the average of all brain images at 250 GMV intensity units. The resulting image was binarized and applied as a pre-mask to all individual images before running analyses. Additionally, on an individual level, we excluded all voxels that exhibited a lower grey matter volume than .1 from the analyses (see standard

parameters of SPM/CAT12 (<http://www.neuro.uni-jena.de/cat12/CAT12-Manual.pdf>). Data distributions were assumed to be normal but this was not formally tested. To illustrate the results of the GMV analyses, we used a standard MNI brain template based on Fonov et al (2011)<sup>10</sup>.

### **1.3.2 Region of interest (ROI)-level IDPs Processed by the UKB**

We use all of the GMV IDPs that were processed and provided by the UKB [for details see ref 11]. These IDPs include GMV of 139 ROIs derived using parcellations from the Harvard-Oxford cortical and subcortical atlases, and Diedrichsen cerebellar atlas. Data distributions were assumed to be normal but this was not formally tested.

### **1.3.3 Additional ROI-level IDPs**

Based on our voxel-level results (see 2.1), we extracted 5 additional ROI-level IDPs that quantified GMV in anatomical substructures that were not derived by the UKB. These ROIs were extracted bilaterally from unbiased masks and included the dorsolateral prefrontal cortex (dlPFC; BA 46), hypothalamus, posterior hippocampus, ventro-anterior insula and ventromedial prefrontal cortex (vmPFC). For the dlPFC, ventro-anterior insula and vmPFC masks, we used recent functional parcellations based on resting state data. The dlPFC mask was derived using the Sallet Dorsal Frontal resting state connectivity-based parcellation (cluster 7/BA46)<sup>12</sup>. Functionally, this area exhibits coupling with the frontal-parietal network (incl. anterior cingulate cortex, parietal cortex and inferior parietal lobe), as well as with the vmPFC. Anatomically, its boundaries show resemblance to BA 46 — an area functionally related to executive function that shows distinct cytoarchitectonic properties.

We extracted GMV from the vmPFC using a parcellation of the medial wall of the prefrontal cortex, based on resting state functional coupling<sup>13</sup>. Specifically, we extracted GMV from 14m — an area linked to cost-benefit integration in value-based decision-making<sup>14-17</sup>, which maintains strong positive coupling with hypothalamus, ventral striatum, and amygdala<sup>18</sup>. The hypothalamus mask was derived from a high-resolution atlas of human subcortical brain nuclei<sup>19</sup>. The posterior hippocampus mask was derived according to recent recommendations for long-axis segmentation of the hippocampus in human neuroimaging<sup>20</sup>. We labeled hippocampal voxels

posterior to the coronal plane at  $y = -21$  in MNI space (which corresponds to the uncus apex of the parahippocampal gyrus), as posterior hippocampus. To ensure spatial precision across participants, we used a minimum 80% likelihood of each voxel being in the anatomical structure for all of the aforementioned masks. The ventro-anterior insula mask was derived following a recent parcellation of the insula based on a resting state functional connectivity analysis by ref 21, which reported that this brain region showed functional coactivation with limbic areas including amygdala, ventral tegmental area (VTA), superior temporal sulcus, and posterolateral orbitofrontal cortex. The raw mask was thresholded at  $z = 10$ .

#### **1.4 Polygenic Risk Score (PRS) for Risky behaviour**

We use the genetic data provided by the UKB to construct a polygenic risk score (PRS) for risky behaviour. As a first step, we rerun the genome-wide association study (GWAS) of risky behaviour (the same measure used in the current study) as reported in ref 1 after excluding the 18,796 genotyped individuals with usable T1 NIFTI structural brain images (UKB field 20252) and all of their relatives up to the third degree (defined using the KING coefficient<sup>22</sup> based on a pairwise coefficient  $>0.0442$ ). The final GWAS sample includes 297,025 individuals of European ancestry. We use BOLT-LMM version 2.3.2<sup>23</sup> to perform GWAS with linear mixed models (LMM), which outperforms linear regression in terms of statistical power and controlling for relatedness<sup>24</sup>.

Next, we perform quality control (QC) of the GWAS results using a standardized QC protocol, described in detail in ref 1. This protocol removes rare and low-quality single-nucleotide polymorphisms (SNPs) based on minor allele frequency (MAF)  $< 0.001$ , imputation quality (INFO)  $< 0.7$ , and SNPs that could not be aligned with the Haplotype Reference Consortium (HRC) reference panel. After QC, a total of 11,514,220 SNPs remains in the GWAS summary statistics. Thereafter, we calculate for each participant  $i$  a PRS,  $S_i$ , by weighting his or her genotype across SNPs ( $j$ ),  $g_{ij}$ , by the corresponding regression coefficients,  $\beta_j$  estimated in the GWAS described above. Thus, the PRS is a linear combination of genetic effects, calculated as:

$$S_i = \sum_{j=1}^M \beta_j g_{ij},$$

where the set of SNPs,  $M$ , is restricted to the consensus genotype set of 1.4 million SNPs established by the International HapMap 3 Consortium<sup>25</sup>, which has been successfully employed for polygenic prediction in many previous studies. Furthermore, the PRS is constructed only with autosomal, bi-allelic SNPs with  $MAF > 0.01$  and  $INFO > 0.9$  in the UKB. The resultant PRS is based on a total of  $M=1,176,729$  SNPs. The PRS is then standardized to mean zero and unit variance in the prediction sample. Data distribution was assumed to be normal but this was not formally tested.

### 1.5 Genetic Correlations of Risky behaviour

We rely on the results of the risky behaviour GWAS to estimate genetic correlations between this phenotype and 85 other traits, using bivariate LD Score regression<sup>26</sup>. The estimates are reported in Supplementary Table 3. For this purpose, we query the “GWAS ATLAS”<sup>27</sup> to identify publicly archived GWAS results that we consider relevant. We supplement the publicly available GWAS with a soon-to-be published GWAS on diet composition<sup>28</sup>. Notably, the collected traits span across many different outcomes, including the anthropometric, behavioural, cognitive, psychiatric, medical, and socioeconomic domains.

We find moderate to strong genetic correlations between our main measure and a range of phenotypes that are considered risky behaviours, including ever consuming cannabis ( $r_g = 0.72$ ;  $SE = 0.03$ ), self-employment ( $r_g = 0.52$ ;  $SE = 0.30$ ), and age at first sexual experience ( $r_g = -0.54$ ;  $SE = 0.02$ ). Our measure of risky behaviour is also genetically correlated with a range of mental disorders including bipolar disorder ( $r_g = 0.23$ ;  $SE = 0.03$ ), major depressive disorder ( $r_g = 0.22$ ;  $SE = 0.03$ ), and schizophrenia ( $r_g = 0.17$ ;  $SE = 0.02$ ). Finally, risky behaviour is genetically correlated in the expected direction with the personality traits of conscientiousness ( $r_g = -0.25$ ;  $SE = 0.10$ ) and extraversion ( $r_g = 0.34$ ;  $SE = 0.05$ ).

## 2. Pre-registration of Analysis Plan and Unplanned Deviations



We pre-registered our analysis plan on Open Science Framework (OSF, <https://osf.io/qkp4g/>). Our pre-registered plan specifies the construction of the dependent variable, the control variables, the inclusion criteria and quality controls, the VBM analyses and the main ROI-level analyses.

We deviated from the pre-registered plan in several cases, which are outlined in the following. These deviations occurred when the computational burden of following the pre-registered plan was unexpectedly high, and when alternative measures that we were not aware of at the time of the pre-registration were made available by the UKB. Specifically, we decided not to use alternative segmentations of the cortex (e.g. Hammer's atlas) as robustness checks for our ROI-level analysis because of the significant computational burden in deriving those measures. Instead, based on the voxel-level analysis, we derived additional ROIs only when they were not derived in sufficient granularity in the IDPs provided by the UKB (see 1.3.3).

Similarly, we did not derive cortical thickness (CT) measures because of the high computational burden using FreeSurfer, which is the gold standard in cortical thickness estimation. While other means to derive CT would have been available (e.g. CAT toolbox), they would provide relatively lower quality data and would not allow analyses of subcortical areas. Additionally, the UKB was expected to release CT measures derived from FreeSurfer before this work was finalized (see [the UKB Data Showcase website for public announcements](#)). The lack of CT measures has also led us to decide to postpone the conduct of an additional pre-registered multivariate analysis.

Finally, our pre-registered plan states that we would run additional robustness checks to control for potential neurotoxic effects of excessive alcohol intake. Upon examining the data for a different project that is focused on the effects of alcohol intake on the brain, we observed effects that were mainly driven by individuals who were heavy drinkers. We therefore decided to deviate from our original plan and exclude all participants who qualified as current or former regular heavy drinkers. However, we also provide additional analyses that include weekly alcohol intake and smoking habits as a covariate (see Extended Data Figure 6). Finally, the pre-registered

analysis of white-matter volume is not reported here, because we decided to focus our manuscript on GMV differences.

## Supplementary Discussion

Our study highlights the importance of using large samples to study associations of neuroanatomy with complex behavioural traits. The largest effect we identify for the relationship between any cluster of voxels and risky behaviour is  $\Delta R^2 = 0.6\%$  (see Supplementary Table 4). It would require more than 1,750 participants to have 90% statistical power at a liberal  $p$ -value threshold of 0.05 (uncorrected) to identify effects of this magnitude. This is a lower bound for the required sample size for such studies that does not reflect the upward bias in our effect size estimate due to the statistical “winner’s curse”, and the need to correct for multiple testing. Previous large-scale VBM studies ( $N > 1000$ ) with other behavioural phenotypes<sup>29</sup> found effect sizes of similar magnitude and suggest that large samples are a prerequisite to detect such an association reliably. Of note, the largest previous study of risk tolerance employed a sample of 108 participants<sup>30</sup> and would have only 12% power to detect  $\Delta R^2 = 0.6\%$  at  $\alpha = 0.05$  (uncorrected).

A possible limitation of our study is that, the specific features of the component phenotypes (e.g., smoking) rather than their first PC (risky behaviour) could have driven the associations we report (quantified via standardized regression coefficients). To further investigate this possibility, we repeat our ROI-based analysis with the individual phenotypic measures (instead of their first PC) as outcome variables (see Supplementary Table 6). We find that 22 out of 23 ROIs are significantly associated with more than one phenotype (the exception is IX Cerebellum (r), which is significantly associated only with the number of sexual partners, yet the standardized coefficient denoting its relationship with the first PC is greater in magnitude than the coefficient denoting its relationship with the number of sexual partners). Furthermore, the standardized coefficients quantifying the relationships between the ROIs and the individual

phenotypes are either smaller than or at the same order of magnitude as the coefficients quantifying their relationship with the first PC.

While our study is larger and more representative than any previous investigation of the topic, and although we control for various potential confounds and replicate our findings in an independent sample, it was conducted in a population of UK individuals of European descent that were over 40 years old at the time of measurement, which limits the generalizability of our results to other populations. Moreover, our results do not exclude the possibility of bias due to other unobserved variables that our analyses do not account for. With the rise of large publicly available data sets [e.g. ref 31], we hope that future studies will be able to test the generalizability of our findings to populations of different ethnicities and age groups (e.g., adolescents).

Finally, while our analyses identify distinct brain areas that mediate gene-phenotype associations for risky behaviour (i.e., putamen, hypothalamus and dlPFC), they do not provide evidence for their causal relationship. For instance, it is possible that a person's genetic disposition would lead them to select into environments that influence both risky behaviour and features of brain anatomy.

**Supplementary Table 1** | Eigenvalues of the four Principal Components of Risky Behaviours

| <b>Component</b>   | <b>Eigenvalue</b> | <b>Cumulative Variance Explained</b> |
|--------------------|-------------------|--------------------------------------|
| <b>Component 1</b> | 1.474             | 0.3685                               |
| <b>Component 2</b> | 0.975             | 0.6121                               |
| <b>Component 3</b> | 0.819             | 0.817                                |
| <b>Component 4</b> | 0.732             | 1                                    |

**Supplementary Table 2** | Eigenvectors of the four Principal Components of Risky Behaviours

| <b>Variable</b>         | <b>Comp1</b> | <b>Comp2</b> | <b>Comp3</b> | <b>Comp4</b> |
|-------------------------|--------------|--------------|--------------|--------------|
| <b>Speeding</b>         | 0.4096       | 0.7643       | 0.1402       | 0.4779       |
| <b>Sexual behaviour</b> | 0.5543       | 0.1448       | -0.6327      | -0.5211      |
| <b>Drinking</b>         | 0.5351       | -0.1876      | 0.7339       | -0.374       |
| <b>Smoking</b>          | 0.4885       | -0.5998      | -0.2036      | 0.6002       |

**Supplementary Table 3** | Genetic correlations ( $r_g$ ) between risky behaviour (GWAS  $N = 297,025$ ) and 85 traits, estimated using bivariate LD Score regression. All  $P$  values are based on two-sided statistical tests.

| Trait                                                                              | Category            | Genetic correlation ( $r_g$ ) | $SE(r_g)$ | Z      | P value |
|------------------------------------------------------------------------------------|---------------------|-------------------------------|-----------|--------|---------|
| Number of sexual partners                                                          | Mental & Behavioral | 0.807                         | 0.009     | 87.168 | <0.001  |
| Smoking initiation                                                                 | Mental & Behavioral | 0.746                         | 0.013     | 59.671 | <0.001  |
| Ever cannabis                                                                      | Mental & Behavioral | 0.721                         | 0.025     | 29.382 | <0.001  |
| Drinks per week                                                                    | Mental & Behavioral | 0.698                         | 0.016     | 44.726 | <0.001  |
| Alcohol dependence                                                                 | Mental & Behavioral | 0.613                         | 0.063     | 9.668  | <0.001  |
| Maternal smoking around birth                                                      | Mental & Behavioral | 0.581                         | 0.026     | 22.676 | <0.001  |
| General risk tolerance                                                             | Mental & Behavioral | 0.559                         | 0.021     | 26.176 | <0.001  |
| Self-employment                                                                    | Mental & Behavioral | 0.517                         | 0.304     | 1.703  | 0.089   |
| Automobile speeding propensity                                                     | Mental & Behavioral | 0.513                         | 0.02      | 26.189 | <0.001  |
| Suicide attempt                                                                    | Mental & Behavioral | 0.473                         | 0.069     | 6.857  | <0.001  |
| Antisocial behaviour                                                               | Mental & Behavioral | 0.453                         | 0.143     | 3.179  | 0.002   |
| Cannabis use disorder                                                              | Mental & Behavioral | 0.442                         | 0.097     | 4.559  | <0.001  |
| Leisure/social activities: Pub or social club                                      | Mental & Behavioral | 0.433                         | 0.028     | 15.272 | <0.001  |
| Own or rent accommodation lived in: Own with a mortgage                            | Mental & Behavioral | 0.409                         | 0.039     | 10.598 | <0.001  |
| Townsend deprivation index                                                         | Mental & Behavioral | 0.401                         | 0.046     | 8.793  | <0.001  |
| Own or rent accommodation lived in: Rent - from private landlord or letting agency | Mental & Behavioral | 0.35                          | 0.073     | 4.803  | <0.001  |
| Extraversion                                                                       | Mental & Behavioral | 0.338                         | 0.054     | 6.284  | <0.001  |
| Stress-related disorder                                                            | Mental & Behavioral | 0.308                         | 0.043     | 7.084  | <0.001  |
| Psychiatric cross-disorder                                                         | Mental & Behavioral | 0.256                         | 0.036     | 7.121  | <0.001  |
| Bipolar disorder                                                                   | Mental & Behavioral | 0.226                         | 0.027     | 8.348  | <0.001  |
| Post-traumatic stress disorder                                                     | Mental & Behavioral | 0.198                         | 0.052     | 3.805  | 0.0001  |
| Smoking cessation                                                                  | Mental & Behavioral | 0.19                          | 0.033     | 5.809  | <0.001  |
| Major depressive disorder                                                          | Mental & Behavioral | 0.18                          | 0.025     | 7.336  | <0.001  |
| Schizophrenia                                                                      | Mental & Behavioral | 0.167                         | 0.021     | 7.979  | <0.001  |
| Anxiety Disorder Case-Control                                                      | Mental & Behavioral | 0.163                         | 0.082     | 1.989  | 0.047   |
| Insomnia                                                                           | Mental & Behavioral | 0.149                         | 0.027     | 5.612  | <0.001  |
| Leisure/social activities: Sports club or gym                                      | Mental & Behavioral | 0.143                         | 0.034     | 4.188  | <0.001  |

|                                                                                                     |                     |        |       |         |        |
|-----------------------------------------------------------------------------------------------------|---------------------|--------|-------|---------|--------|
| Anxiety Disorder FactorScore                                                                        | Mental & Behavioral | 0.116  | 0.087 | 1.331   | 0.183  |
| Cigarettes per day                                                                                  | Mental & Behavioral | 0.112  | 0.031 | 3.679   | <0.001 |
| Own or rent accommodation lived in: Rent - from local authority, local council, housing association | Mental & Behavioral | 0.098  | 0.035 | 2.793   | 0.005  |
| Openness                                                                                            | Mental & Behavioral | 0.076  | 0.06  | 1.263   | 0.206  |
| Autism spectrum disorder (ASD)                                                                      | Mental & Behavioral | 0.048  | 0.039 | 1.231   | 0.218  |
| Intelligence                                                                                        | Mental & Behavioral | 0.039  | 0.023 | 1.679   | 0.093  |
| Household income                                                                                    | Mental & Behavioral | 0.03   | 0.037 | 0.815   | 0.415  |
| Neuroticism                                                                                         | Mental & Behavioral | -0.012 | 0.059 | -0.21   | 0.834  |
| Anorexia                                                                                            | Mental & Behavioral | -0.022 | 0.032 | -0.698  | 0.485  |
| Educational attainment                                                                              | Mental & Behavioral | -0.028 | 0.02  | -1.382  | 0.167  |
| Tourette's syndrome                                                                                 | Mental & Behavioral | -0.03  | 0.042 | -0.731  | 0.465  |
| Friendships satisfaction                                                                            | Mental & Behavioral | -0.057 | 0.034 | -1.705  | 0.088  |
| Leisure/social activities: Adult education class                                                    | Mental & Behavioral | -0.057 | 0.04  | -1.414  | 0.157  |
| Childhood intelligence                                                                              | Mental & Behavioral | -0.073 | 0.056 | -1.299  | 0.194  |
| Sleep duration                                                                                      | Mental & Behavioral | -0.081 | 0.023 | -3.579  | <0.001 |
| Obsessive compulsive disorder                                                                       | Mental & Behavioral | -0.105 | 0.05  | -2.103  | 0.036  |
| Subjective well-being                                                                               | Mental & Behavioral | -0.108 | 0.035 | -3.06   | 0.002  |
| Chronotype                                                                                          | Mental & Behavioral | -0.162 | 0.022 | -7.357  | <0.001 |
| Family relationship satisfaction                                                                    | Mental & Behavioral | -0.247 | 0.037 | -6.728  | <0.001 |
| Leisure/social activities: Religious group                                                          | Mental & Behavioral | -0.251 | 0.026 | -9.564  | <0.001 |
| Conscientiousness                                                                                   | Mental & Behavioral | -0.251 | 0.101 | -2.497  | 0.013  |
| Own outright (by you or someone in your household)                                                  | Mental & Behavioral | -0.365 | 0.028 | -12.865 | <0.001 |
| Agreeableness                                                                                       | Mental & Behavioral | -0.386 | 0.399 | -0.969  | 0.333  |
| Age of smoking initiation                                                                           | Mental & Behavioral | -0.401 | 0.029 | -13.946 | <0.001 |
| Age at first sex                                                                                    | Mental & Behavioral | -0.536 | 0.018 | -29.502 | <0.001 |
| Coronary artery disease                                                                             | Circulatory         | 0.069  | 0.021 | 3.307   | <0.001 |
| Blood pressure                                                                                      | Circulatory         | -0.06  | 0.02  | -3.034  | 0.002  |
| Heart rate                                                                                          | Circulatory         | -0.074 | 0.019 | -3.798  | <0.001 |
| Age of first facial hair (male)                                                                     | Dermatologic        | 0.1    | 0.028 | 3.585   | <0.001 |
| Stomach or abdominal pain                                                                           | Digestive           | 0.043  | 0.037 | 1.151   | 0.249  |
| Fat (diet composition)                                                                              | Digestive           | 0.009  | 0.038 | 0.221   | 0.825  |
| Protein (diet composition)                                                                          | Digestive           | -0.016 | 0.039 | -0.411  | 0.681  |
| Sugar (diet composition)                                                                            | Digestive           | -0.327 | 0.032 | -10.168 | <0.001 |

|                                  |                       |        |       |         |        |
|----------------------------------|-----------------------|--------|-------|---------|--------|
| Carbohydrates (diet composition) | Digestive             | -0.53  | 0.028 | -18.795 | <0.001 |
| Waist-to-hip ratio (WHR)         | Endocrine & Metabolic | 0.089  | 0.019 | 4.685   | <0.001 |
| Body mass index                  | Endocrine & Metabolic | 0.066  | 0.019 | 3.424   | <0.001 |
| Type 2 diabetes                  | Endocrine & Metabolic | -0.017 | 0.022 | -0.793  | 0.428  |
| Chronic kidney disease           | Endocrine & Metabolic | -0.157 | 0.066 | -2.39   | 0.017  |
| Age at menarche                  | Genitourinary         | 0.054  | 0.024 | 2.302   | 0.021  |
| Age at menopause                 | Genitourinary         | -0.084 | 0.028 | -2.969  | 0.003  |
| Mother's age at death            | Longevity             | -0.164 | 0.062 | -2.645  | 0.008  |
| Parental lifespan                | Longevity             | -0.169 | 0.029 | -5.943  | <0.001 |
| Fathers age at death             | Longevity             | -0.188 | 0.038 | -4.994  | <0.001 |
| Hip pain                         | Musculoskeletal       | 0.183  | 0.038 | 4.841   | <0.001 |
| Back pain                        | Musculoskeletal       | 0.173  | 0.028 | 6.095   | <0.001 |
| Knee pain                        | Musculoskeletal       | 0.143  | 0.028 | 5.038   | <0.001 |
| Neck or shoulder pain            | Musculoskeletal       | 0.132  | 0.03  | 4.392   | <0.001 |
| Height                           | Musculoskeletal       | 0.065  | 0.014 | 4.633   | <0.001 |
| Infant birth weight              | Musculoskeletal       | 0.053  | 0.025 | 2.133   | 0.033  |
| Infant head circumference        | Musculoskeletal       | 0.036  | 0.061 | 0.588   | 0.557  |
| Rheumatoid arthritis             | Musculoskeletal       | -0.018 | 0.032 | -0.547  | 0.585  |
| Cancer (diagnosed by doctor)     | Neoplasms             | 0.113  | 0.051 | 2.222   | 0.026  |
| Alzheimer's disease              | Neurological          | 0.032  | 0.042 | 0.749   | 0.454  |
| Parkinson's disease              | Neurological          | -0.022 | 0.054 | -0.395  | 0.693  |
| Headache                         | Neurological          | -0.085 | 0.03  | -2.89   | 0.004  |
| Asthma                           | Respiratory           | 0.074  | 0.024 | 3.111   | 0.002  |

**Supplementary Table 4** | Association between risky behaviour and grey matter volumes (GMV) in clusters of voxels ( $N = 12,675$ ). Depicted are the summarized regression statistics per cluster.  $\Delta R^2$  indicates the marginal increase in variance explained compared to a model that excludes GMV from the respective cluster. The corresponding coordinates of the peak activation in each cluster can be found in Extended Data Figure 3.

| <b>Cluster</b> | $\beta$ | <b>95% CI</b>   | <b>SE</b> | $P_{uncorr}$           | <b>T(12,562)</b> | $R^2$ | $\Delta R^2$ |
|----------------|---------|-----------------|-----------|------------------------|------------------|-------|--------------|
| <b>1</b>       | -0.115  | [-0.14,-0.091]  | 0.013     | $1.15 \times 10^{-19}$ | -9.089           | 0.048 | 0.006        |
| <b>2</b>       | -0.108  | [-0.133,-0.084] | 0.013     | $1.15 \times 10^{-17}$ | -8.571           | 0.048 | 0.006        |
| <b>3</b>       | -0.064  | [-0.082,-0.045] | 0.010     | $3.01 \times 10^{-11}$ | -6.652           | 0.045 | 0.003        |
| <b>4</b>       | -0.061  | [-0.08,-0.042]  | 0.010     | $2.06 \times 10^{-10}$ | -6.362           | 0.045 | 0.003        |
| <b>5</b>       | -0.078  | [-0.098,-0.057] | 0.011     | $3.66 \times 10^{-13}$ | -7.275           | 0.046 | 0.004        |
| <b>6</b>       | -0.072  | [-0.093,-0.051] | 0.011     | $2.21 \times 10^{-11}$ | -6.697           | 0.045 | 0.003        |
| <b>7</b>       | -0.054  | [-0.073,-0.035] | 0.010     | $1.46 \times 10^{-8}$  | -5.670           | 0.044 | 0.002        |
| <b>8</b>       | -0.066  | [-0.089,-0.042] | 0.012     | $4.11 \times 10^{-8}$  | -5.490           | 0.044 | 0.002        |
| <b>9</b>       | -0.066  | [-0.087,-0.045] | 0.011     | $7.64 \times 10^{-10}$ | -6.157           | 0.045 | 0.003        |
| <b>10</b>      | -0.064  | [-0.085,-0.043] | 0.011     | $2.6 \times 10^{-9}$   | -5.960           | 0.045 | 0.003        |
| <b>11</b>      | -0.066  | [-0.088,-0.044] | 0.011     | $4.50 \times 10^{-9}$  | -5.869           | 0.045 | 0.003        |
| <b>12</b>      | -0.061  | [-0.081,-0.04]  | 0.011     | $9.33 \times 10^{-9}$  | -5.746           | 0.044 | 0.003        |
| <b>13</b>      | -0.057  | [-0.077,-0.036] | 0.010     | $4.77 \times 10^{-8}$  | -5.463           | 0.044 | 0.002        |
| <b>14</b>      | -0.053  | [-0.072,-0.033] | 0.010     | $1.06 \times 10^{-7}$  | -5.319           | 0.044 | 0.002        |
| <b>15</b>      | -0.054  | [-0.074,-0.034] | 0.010     | $1.14 \times 10^{-7}$  | -5.306           | 0.044 | 0.002        |
| <b>16</b>      | -0.052  | [-0.071,-0.032] | 0.010     | $3.44 \times 10^{-7}$  | -5.100           | 0.044 | 0.002        |



|           |        |                 |       |                        |        |       |       |
|-----------|--------|-----------------|-------|------------------------|--------|-------|-------|
| <b>17</b> | -0.051 | [-0.071,-0.032] | 0.010 | $3.42 \times 10^{-07}$ | -5.102 | 0.044 | 0.002 |
| <b>18</b> | -0.051 | [-0.07,-0.031]  | 0.010 | $3.66 \times 10^{-07}$ | -5.088 | 0.044 | 0.002 |
| <b>19</b> | -0.050 | [-0.07,-0.03]   | 0.010 | $6.84 \times 10^{-07}$ | -4.969 | 0.044 | 0.002 |
| <b>20</b> | -0.049 | [-0.068,-0.03]  | 0.010 | $6.23 \times 10^{-07}$ | -4.987 | 0.044 | 0.002 |
| <b>21</b> | -0.049 | [-0.068,-0.029] | 0.010 | $1.19 \times 10^{-06}$ | -4.870 | 0.044 | 0.002 |

**Supplementary Table 5** | Effect sizes (standardized betas) and 95% confidence interval (uncorrected) of associations between risky behaviour and grey matter volumes (GMV) in 23 ROIs, with and without controlling for cognitive and socioeconomic outcomes ( $N = 11,864$ ). Additional controls include education years, fluid IQ, zip-code level social deprivation, household income, number of household members, birth location. Both models include all standard controls. The sample size of the analysis with additional controls is reduced due to missing data for some variables. \*FWE-rate of 5%; \*\*FWE-rate of 1%.

| ROI                    | Risky behaviour<br>(with additional controls)                                        | Risky behaviour<br>(with standard controls)                                          |
|------------------------|--------------------------------------------------------------------------------------|--------------------------------------------------------------------------------------|
| vmPFC (l)              | -0.055** [-0.081, -0.03]<br>$t(11,647) = -4.27$ $p_{uncorr} = 2.01 \times 10^{-5}$   | -0.056** [-0.08, -0.031]<br>$t(12,562) = -4.44$ $p_{uncorr} = 8.88 \times 10^{-6}$   |
| dIPFC (r) (BA46)       | -0.065** [-0.087, -0.044]<br>$t(11,647) = -5.98$ $p_{uncorr} = 2.29 \times 10^{-9}$  | -0.065** [-0.086, -0.044]<br>$t(12,562) = -6.15$ $p_{uncorr} = 7.91 \times 10^{-10}$ |
| dIPFC (l) (BA46)       | -0.044** [-0.066, -0.022]<br>$t(11,647) = -3.93$ $p_{uncorr} = 8.64 \times 10^{-5}$  | -0.048** [-0.069, -0.027]<br>$t(12,562) = -4.44$ $p_{uncorr} = 8.96 \times 10^{-6}$  |
| Precentral Gyrus (r)   | -0.057** [-0.079, -0.036]<br>$t(11,647) = -5.17$ $p_{uncorr} = 2.37 \times 10^{-7}$  | -0.061** [-0.082, -0.04]<br>$t(12,562) = -5.65$ $p_{uncorr} = 1.6 \times 10^{-8}$    |
| Cuneal Cortex (l)      | -0.031 [-0.051, -0.012]<br>$t(11,647) = -3.18$ $p_{uncorr} = 1.46 \times 10^{-3}$    | -0.038** [-0.057, -0.02]<br>$t(12,562) = -4$ $p_{uncorr} = 6.48 \times 10^{-5}$      |
| Hypothalamus           | -0.066** [-0.087, -0.044]<br>$t(11,647) = -6.02$ $p_{uncorr} = 1.84 \times 10^{-9}$  | -0.068** [-0.089, -0.047]<br>$t(12,562) = -6.41$ $p_{uncorr} = 1.53 \times 10^{-10}$ |
| Putamen (l)            | -0.057** [-0.076, -0.039]<br>$t(11,647) = -6.06$ $p_{uncorr} = 1.4 \times 10^{-9}$   | -0.061** [-0.079, -0.043]<br>$t(12,562) = -6.67$ $p_{uncorr} = 2.69 \times 10^{-11}$ |
| Putamen (r)            | -0.055** [-0.073, -0.036]<br>$t(11,647) = -5.79$ $p_{uncorr} = 7.34 \times 10^{-9}$  | -0.055** [-0.073, -0.037]<br>$t(12,562) = -5.98$ $p_{uncorr} = 2.34 \times 10^{-9}$  |
| Amygdala (l)           | -0.073** [-0.095, -0.051]<br>$t(11,647) = -6.39$ $p_{uncorr} = 1.77 \times 10^{-10}$ | -0.072** [-0.094, -0.051]<br>$t(12,562) = -6.54$ $p_{uncorr} = 6.34 \times 10^{-11}$ |
| Amygdala (r)           | -0.066** [-0.089, -0.043]<br>$t(11,647) = -5.73$ $p_{uncorr} = 1.01 \times 10^{-8}$  | -0.073** [-0.095, -0.051]<br>$t(12,562) = -6.58$ $p_{uncorr} = 4.85 \times 10^{-11}$ |
| Ventral Striatum (l)   | -0.045** [-0.066, -0.024]<br>$t(11,647) = -4.23$ $p_{uncorr} = 2.31 \times 10^{-5}$  | -0.048** [-0.068, -0.027]<br>$t(12,562) = -4.61$ $p_{uncorr} = 4.16 \times 10^{-6}$  |
| Ventral Striatum (r)   | -0.052** [-0.072, -0.031]<br>$t(11,647) = -4.81$ $p_{uncorr} = 1.5 \times 10^{-6}$   | -0.053** [-0.074, -0.033]<br>$t(12,562) = -5.12$ $p_{uncorr} = 3.17 \times 10^{-7}$  |
| Brain-Stem             | -0.035 [-0.055, -0.015]<br>$t(11,647) = -3.43$ $p_{uncorr} = 6.11 \times 10^{-4}$    | -0.041** [-0.061, -0.022]<br>$t(12,562) = -4.15$ $p_{uncorr} = 3.4 \times 10^{-5}$   |
| Crus I Cerebellum (l)  | -0.039* [-0.059, -0.019]<br>$t(11,647) = -3.89$ $p_{uncorr} = 9.88 \times 10^{-5}$   | -0.04** [-0.059, -0.02]<br>$t(12,562) = -4.05$ $p_{uncorr} = 5.2 \times 10^{-5}$     |
| Crus II Cerebellum (l) | -0.041** [-0.06, -0.021]<br>$t(11,647) = -4.13$ $p_{uncorr} = 3.59 \times 10^{-5}$   | -0.038** [-0.057, -0.02]<br>$t(12,562) = -4$ $p_{uncorr} = 6.45 \times 10^{-5}$      |
| VIIb Cerebellum (l)    | -0.055** [-0.074, -0.036]<br>$t(11,647) = -5.71$ $p_{uncorr} = 1.17 \times 10^{-8}$  | -0.054** [-0.072, -0.035]<br>$t(12,562) = -5.72$ $p_{uncorr} = 1.12 \times 10^{-8}$  |

|                                  |                                                                                      |                                                                                      |
|----------------------------------|--------------------------------------------------------------------------------------|--------------------------------------------------------------------------------------|
| <b>VIIb Cerebellum (r)</b>       | -0.044** [-0.063, -0.025]<br>$t(11,647) = -4.48$ $p_{uncorr} = 7.67 \times 10^{-6}$  | -0.042** [-0.06, -0.023]<br>$t(12,562) = -4.4$ $p_{uncorr} = 1.08 \times 10^{-5}$    |
| <b>VIIa Cerebellum (l)</b>       | -0.053** [-0.072, -0.034]<br>$t(11,647) = -5.45$ $p_{uncorr} = 5.06 \times 10^{-8}$  | -0.05** [-0.069, -0.032]<br>$t(12,562) = -5.31$ $p_{uncorr} = 1.13 \times 10^{-7}$   |
| <b>VIIa Cerebellum (r)</b>       | -0.052** [-0.071, -0.032]<br>$t(11,647) = -5.31$ $p_{uncorr} = 1.15 \times 10^{-7}$  | -0.048** [-0.067, -0.03]<br>$t(12,562) = -5.13$ $p_{uncorr} = 2.99 \times 10^{-7}$   |
| <b>IX Cerebellum (r)</b>         | -0.038** [-0.056, -0.019]<br>$t(11,647) = -4$ $p_{uncorr} = 6.43 \times 10^{-5}$     | -0.036** [-0.054, -0.018]<br>$t(12,562) = -3.92$ $p_{uncorr} = 8.93 \times 10^{-5}$  |
| <b>Ventroanterior Insula (r)</b> | -0.079** [-0.104, -0.055]<br>$t(11,647) = -6.29$ $p_{uncorr} = 3.34 \times 10^{-10}$ | -0.079** [-0.103, -0.055]<br>$t(12,562) = -6.43$ $p_{uncorr} = 1.34 \times 10^{-10}$ |
| <b>Ventroanterior Insula (l)</b> | -0.068** [-0.093, -0.042]<br>$t(11,647) = -5.24$ $p_{uncorr} = 1.66 \times 10^{-7}$  | -0.065** [-0.09, -0.041]<br>$t(12,562) = -5.24$ $p_{uncorr} = 1.65 \times 10^{-7}$   |
| <b>Planum Polare (l)</b>         | -0.039* [-0.06, -0.018]<br>$t(11,647) = -3.68$ $p_{uncorr} = 2.36 \times 10^{-4}$    | -0.043** [-0.063, -0.022]<br>$t(12,562) = -4.13$ $p_{uncorr} = 3.68 \times 10^{-5}$  |

**Supplementary Table 6** | Effect sizes (standardized betas) and the corresponding 95% confidence interval (uncorrected) of the associations between grey matter volumes in 23 ROIs and individual phenotypes of risky behaviour ( $N=12,675$ ). Models include all of the standard control variables. \*FWE-rate of 5 %; \*\*FWE-rate of 1%.

| ROI                           | Risky behaviour                                                                         | Drinks Weekly                                                                           | Speeding                                                                            | # Lifetime sexual partners                                                             | Ever Smoked                                                                            |
|-------------------------------|-----------------------------------------------------------------------------------------|-----------------------------------------------------------------------------------------|-------------------------------------------------------------------------------------|----------------------------------------------------------------------------------------|----------------------------------------------------------------------------------------|
| <b>vmPFC (l)</b>              | -0.056** [-0.08, -0.031]<br>$t(12,562) = -4.44$<br>$p_{uncorr} = 8.88 \times 10^{-6}$   | -0.062** [-0.086, -0.038]<br>$t(12,562) = -5.12$<br>$p_{uncorr} = 3.08 \times 10^{-7}$  | 0.022 [-0.003, 0.046]<br>$t(12,562) = 1.73$<br>$p_{uncorr} = 8.31 \times 10^{-2}$   | -0.038* [-0.062, -0.014]<br>$t(12,562) = -3.07$<br>$p_{uncorr} = 2.17 \times 10^{-3}$  | -0.057** [-0.081, -0.032]<br>$t(12,562) = -4.48$<br>$p_{uncorr} = 7.57 \times 10^{-6}$ |
| <b>dIPFC (r) (BA46)</b>       | -0.065** [-0.086, -0.044]<br>$t(12,562) = -6.15$<br>$p_{uncorr} = 7.91 \times 10^{-10}$ | -0.056** [-0.076, -0.036]<br>$t(12,562) = -5.49$<br>$p_{uncorr} = 4.15 \times 10^{-8}$  | -0.003 [-0.024, 0.017]<br>$t(12,562) = -0.31$<br>$p_{uncorr} = 7.54 \times 10^{-1}$ | -0.046** [-0.067, -0.026]<br>$t(12,562) = -4.48$<br>$p_{uncorr} = 7.5 \times 10^{-6}$  | -0.051** [-0.071, -0.03]<br>$t(12,562) = -4.75$<br>$p_{uncorr} = 2.07 \times 10^{-6}$  |
| <b>dIPFC (l) (BA46)</b>       | -0.048** [-0.069, -0.027]<br>$t(12,562) = -4.44$<br>$p_{uncorr} = 8.96 \times 10^{-6}$  | -0.052** [-0.072, -0.031]<br>$t(12,562) = -5$<br>$p_{uncorr} = 5.95 \times 10^{-7}$     | 0.005 [-0.016, 0.026]<br>$t(12,562) = 0.49$<br>$p_{uncorr} = 6.23 \times 10^{-1}$   | -0.032* [-0.053, -0.012]<br>$t(12,562) = -3.05$<br>$p_{uncorr} = 2.26 \times 10^{-3}$  | -0.038** [-0.06, -0.017]<br>$t(12,562) = -3.53$<br>$p_{uncorr} = 4.1 \times 10^{-4}$   |
| <b>Precentral Gyrus (r)</b>   | -0.061** [-0.082, -0.04]<br>$t(12,562) = -5.65$<br>$p_{uncorr} = 1.6 \times 10^{-8}$    | -0.075** [-0.095, -0.054]<br>$t(12,562) = -7.21$<br>$p_{uncorr} = 6.03 \times 10^{-13}$ | 0.013 [-0.008, 0.034]<br>$t(12,562) = 1.19$<br>$p_{uncorr} = 2.32 \times 10^{-1}$   | -0.029 [-0.05, -0.008]<br>$t(12,562) = -2.72$<br>$p_{uncorr} = 6.48 \times 10^{-3}$    | -0.062** [-0.083, -0.041]<br>$t(12,562) = -5.7$<br>$p_{uncorr} = 1.21 \times 10^{-8}$  |
| <b>Cuneal Cortex (l)</b>      | -0.038** [-0.057, -0.02]<br>$t(12,562) = -4$<br>$p_{uncorr} = 6.48 \times 10^{-5}$      | -0.041** [-0.059, -0.022]<br>$t(12,562) = -4.39$<br>$p_{uncorr} = 1.14 \times 10^{-5}$  | -0.009 [-0.028, 0.01]<br>$t(12,562) = -0.93$<br>$p_{uncorr} = 3.54 \times 10^{-1}$  | -0.008 [-0.026, 0.011]<br>$t(12,562) = -0.83$<br>$p_{uncorr} = 4.06 \times 10^{-1}$    | -0.041** [-0.06, -0.022]<br>$t(12,562) = -4.25$<br>$p_{uncorr} = 2.16 \times 10^{-5}$  |
| <b>Hypothalamus</b>           | -0.068** [-0.089, -0.047]<br>$t(12,562) = -6.41$<br>$p_{uncorr} = 1.53 \times 10^{-10}$ | -0.084** [-0.104, -0.064]<br>$t(12,562) = -8.18$<br>$p_{uncorr} = 3 \times 10^{-16}$    | -0.014 [-0.035, 0.007]<br>$t(12,562) = -1.33$<br>$p_{uncorr} = 1.82 \times 10^{-1}$ | -0.034* [-0.055, -0.014]<br>$t(12,562) = -3.28$<br>$p_{uncorr} = 1.04 \times 10^{-3}$  | -0.043** [-0.064, -0.022]<br>$t(12,562) = -3.98$<br>$p_{uncorr} = 6.89 \times 10^{-5}$ |
| <b>Putamen (l)</b>            | -0.061** [-0.079, -0.043]<br>$t(12,562) = -6.67$<br>$p_{uncorr} = 2.69 \times 10^{-11}$ | -0.042** [-0.06, -0.025]<br>$t(12,562) = -4.83$<br>$p_{uncorr} = 1.37 \times 10^{-6}$   | -0.022 [-0.04, -0.004]<br>$t(12,562) = -2.45$<br>$p_{uncorr} = 1.43 \times 10^{-2}$ | -0.03* [-0.047, -0.012]<br>$t(12,562) = -3.3$<br>$p_{uncorr} = 9.56 \times 10^{-4}$    | -0.054** [-0.072, -0.036]<br>$t(12,562) = -5.88$<br>$p_{uncorr} = 4.23 \times 10^{-9}$ |
| <b>Putamen (r)</b>            | -0.055** [-0.073, -0.037]<br>$t(12,562) = -5.98$<br>$p_{uncorr} = 2.34 \times 10^{-9}$  | -0.035** [-0.052, -0.017]<br>$t(12,562) = -3.93$<br>$p_{uncorr} = 8.5 \times 10^{-5}$   | -0.016 [-0.034, 0.002]<br>$t(12,562) = -1.79$<br>$p_{uncorr} = 7.3 \times 10^{-2}$  | -0.024 [-0.042, -0.006]<br>$t(12,562) = -2.67$<br>$p_{uncorr} = 7.68 \times 10^{-3}$   | -0.057** [-0.075, -0.039]<br>$t(12,562) = -6.21$<br>$p_{uncorr} = 5.4 \times 10^{-10}$ |
| <b>Amygdala (l)</b>           | -0.072** [-0.094, -0.051]<br>$t(12,562) = -6.54$<br>$p_{uncorr} = 6.34 \times 10^{-11}$ | -0.05** [-0.071, -0.03]<br>$t(12,562) = -4.73$<br>$p_{uncorr} = 2.28 \times 10^{-6}$    | -0.006 [-0.028, 0.016]<br>$t(12,562) = -0.53$<br>$p_{uncorr} = 5.95 \times 10^{-1}$ | -0.056** [-0.078, -0.035]<br>$t(12,562) = -5.2$<br>$p_{uncorr} = 2.06 \times 10^{-7}$  | -0.057** [-0.079, -0.036]<br>$t(12,562) = -5.15$<br>$p_{uncorr} = 2.62 \times 10^{-7}$ |
| <b>Amygdala (r)</b>           | -0.073** [-0.095, -0.051]<br>$t(12,562) = -6.58$<br>$p_{uncorr} = 4.85 \times 10^{-11}$ | -0.064** [-0.085, -0.043]<br>$t(12,562) = -5.97$<br>$p_{uncorr} = 2.41 \times 10^{-9}$  | -0.011 [-0.032, 0.011]<br>$t(12,562) = -0.95$<br>$p_{uncorr} = 3.4 \times 10^{-1}$  | -0.042** [-0.064, -0.021]<br>$t(12,562) = -3.89$<br>$p_{uncorr} = 1.02 \times 10^{-4}$ | -0.062** [-0.084, -0.04]<br>$t(12,562) = -5.51$<br>$p_{uncorr} = 3.68 \times 10^{-8}$  |
| <b>Ventral Striatum (l)</b>   | -0.048** [-0.068, -0.027]<br>$t(12,562) = -4.61$<br>$p_{uncorr} = 4.16 \times 10^{-6}$  | -0.025 [-0.045, -0.005]<br>$t(12,562) = -2.5$<br>$p_{uncorr} = 1.25 \times 10^{-2}$     | -0.012 [-0.032, 0.009]<br>$t(12,562) = -1.12$<br>$p_{uncorr} = 2.63 \times 10^{-1}$ | -0.038** [-0.058, -0.018]<br>$t(12,562) = -3.76$<br>$p_{uncorr} = 1.7 \times 10^{-4}$  | -0.036** [-0.057, -0.016]<br>$t(12,562) = -3.46$<br>$p_{uncorr} = 5.43 \times 10^{-4}$ |
| <b>Ventral Striatum (r)</b>   | -0.053** [-0.074, -0.033]<br>$t(12,562) = -5.12$<br>$p_{uncorr} = 3.17 \times 10^{-7}$  | -0.028 [-0.048, -0.008]<br>$t(12,562) = -2.8$<br>$p_{uncorr} = 5.11 \times 10^{-3}$     | -0.004 [-0.025, 0.016]<br>$t(12,562) = -0.42$<br>$p_{uncorr} = 6.74 \times 10^{-1}$ | -0.038** [-0.058, -0.018]<br>$t(12,562) = -3.76$<br>$p_{uncorr} = 1.72 \times 10^{-4}$ | -0.052** [-0.073, -0.032]<br>$t(12,562) = -4.98$<br>$p_{uncorr} = 6.34 \times 10^{-7}$ |
| <b>Brain-Stem</b>             | -0.041** [-0.061, -0.022]<br>$t(12,562) = -4.15$<br>$p_{uncorr} = 3.4 \times 10^{-5}$   | -0.06** [-0.079, -0.041]<br>$t(12,562) = -6.22$<br>$p_{uncorr} = 4.98 \times 10^{-10}$  | -0.012 [-0.032, 0.007]<br>$t(12,562) = -1.23$<br>$p_{uncorr} = 2.17 \times 10^{-1}$ | -0.032* [-0.052, -0.013]<br>$t(12,562) = -3.32$<br>$p_{uncorr} = 9.12 \times 10^{-4}$  | -0.003 [-0.023, 0.017]<br>$t(12,562) = -0.3$<br>$p_{uncorr} = 7.62 \times 10^{-1}$     |
| <b>Crus I Cerebellum (l)</b>  | -0.04** [-0.059, -0.02]<br>$t(12,562) = -4.05$<br>$p_{uncorr} = 5.2 \times 10^{-5}$     | -0.028 [-0.047, -0.01]<br>$t(12,562) = -3$<br>$p_{uncorr} = 2.67 \times 10^{-3}$        | 0.002 [-0.017, 0.021]<br>$t(12,562) = 0.22$<br>$p_{uncorr} = 8.26 \times 10^{-1}$   | -0.03* [-0.049, -0.011]<br>$t(12,562) = -3.12$<br>$p_{uncorr} = 1.83 \times 10^{-3}$   | -0.037** [-0.056, -0.017]<br>$t(12,562) = -3.71$<br>$p_{uncorr} = 2.1 \times 10^{-4}$  |
| <b>Crus II Cerebellum (l)</b> | -0.038** [-0.057, -0.02]<br>$t(12,562) = -4$<br>$p_{uncorr} = 6.45 \times 10^{-5}$      | -0.017 [-0.035, 0.001]<br>$t(12,562) = -1.86$<br>$p_{uncorr} = 6.34 \times 10^{-2}$     | -0.012 [-0.03, 0.007]<br>$t(12,562) = -1.21$<br>$p_{uncorr} = 2.28 \times 10^{-1}$  | -0.03* [-0.048, -0.011]<br>$t(12,562) = -3.17$<br>$p_{uncorr} = 1.53 \times 10^{-3}$   | -0.03* [-0.049, -0.011]<br>$t(12,562) = -3.13$<br>$p_{uncorr} = 1.78 \times 10^{-3}$   |
| <b>VIIb Cerebellum (l)</b>    | -0.054** [-0.072, -0.035]<br>$t(12,562) = -5.72$<br>$p_{uncorr} = 1.12 \times 10^{-8}$  | -0.028* [-0.046, -0.01]<br>$t(12,562) = -3.08$<br>$p_{uncorr} = 2.07 \times 10^{-3}$    | -0.017 [-0.036, 0.001]<br>$t(12,562) = -1.85$<br>$p_{uncorr} = 6.43 \times 10^{-2}$ | -0.039** [-0.057, -0.021]<br>$t(12,562) = -4.23$<br>$p_{uncorr} = 2.3 \times 10^{-5}$  | -0.042** [-0.06, -0.023]<br>$t(12,562) = -4.4$<br>$p_{uncorr} = 1.08 \times 10^{-5}$   |

|                                  |                                                                                                |                                                                                               |                                                                                             |                                                                                               |                                                                                                |
|----------------------------------|------------------------------------------------------------------------------------------------|-----------------------------------------------------------------------------------------------|---------------------------------------------------------------------------------------------|-----------------------------------------------------------------------------------------------|------------------------------------------------------------------------------------------------|
| <b>VIIb Cerebellum (r)</b>       | -0.042** [-0.06, -0.023]<br>$t(12,562) = -4.4$<br>$p_{\text{uncorr}} = 1.08 \times 10^{-5}$    | -0.018 [-0.036, 0]<br>$t(12,562) = -2$<br>$p_{\text{uncorr}} = 4.51 \times 10^{-2}$           | -0.012 [-0.031, 0.006]<br>$t(12,562) = -1.29$<br>$p_{\text{uncorr}} = 1.96 \times 10^{-1}$  | -0.032** [-0.05, -0.014]<br>$t(12,562) = -3.45$<br>$p_{\text{uncorr}} = 5.7 \times 10^{-4}$   | -0.034** [-0.053, -0.015]<br>$t(12,562) = -3.55$<br>$p_{\text{uncorr}} = 3.84 \times 10^{-4}$  |
| <b>VIIa Cerebellum (l)</b>       | -0.05** [-0.069, -0.032]<br>$t(12,562) = -5.31$<br>$p_{\text{uncorr}} = 1.13 \times 10^{-7}$   | -0.026 [-0.044, -0.008]<br>$t(12,562) = -2.87$<br>$p_{\text{uncorr}} = 4.09 \times 10^{-3}$   | -0.021 [-0.04, -0.003]<br>$t(12,562) = -2.24$<br>$p_{\text{uncorr}} = 2.52 \times 10^{-2}$  | -0.037** [-0.055, -0.019]<br>$t(12,562) = -3.98$<br>$p_{\text{uncorr}} = 6.96 \times 10^{-5}$ | -0.034** [-0.053, -0.016]<br>$t(12,562) = -3.59$<br>$p_{\text{uncorr}} = 3.27 \times 10^{-4}$  |
| <b>VIIa Cerebellum (r)</b>       | -0.048** [-0.067, -0.03]<br>$t(12,562) = -5.13$<br>$p_{\text{uncorr}} = 2.99 \times 10^{-7}$   | -0.019 [-0.037, -0.002]<br>$t(12,562) = -2.14$<br>$p_{\text{uncorr}} = 3.2 \times 10^{-2}$    | -0.016 [-0.034, 0.003]<br>$t(12,562) = -1.67$<br>$p_{\text{uncorr}} = 9.43 \times 10^{-2}$  | -0.033** [-0.051, -0.015]<br>$t(12,562) = -3.56$<br>$p_{\text{uncorr}} = 3.66 \times 10^{-4}$ | -0.044** [-0.062, -0.025]<br>$t(12,562) = -4.62$<br>$p_{\text{uncorr}} = 3.81 \times 10^{-6}$  |
| <b>IX Cerebellum (r)</b>         | -0.036** [-0.054, -0.018]<br>$t(12,562) = -3.92$<br>$p_{\text{uncorr}} = 8.93 \times 10^{-5}$  | -0.016 [-0.033, 0.001]<br>$t(12,562) = -1.79$<br>$p_{\text{uncorr}} = 7.31 \times 10^{-2}$    | -0.024 [-0.042, -0.006]<br>$t(12,562) = -2.65$<br>$p_{\text{uncorr}} = 8.03 \times 10^{-3}$ | -0.028* [-0.046, -0.011]<br>$t(12,562) = -3.19$<br>$p_{\text{uncorr}} = 1.42 \times 10^{-3}$  | -0.016 [-0.034, 0.002]<br>$t(12,562) = -1.76$<br>$p_{\text{uncorr}} = 7.8 \times 10^{-2}$      |
| <b>Ventroanterior Insula (r)</b> | -0.079** [-0.103, -0.055]<br>$t(12,562) = -6.43$<br>$p_{\text{uncorr}} = 1.34 \times 10^{-10}$ | -0.068** [-0.091, -0.045]<br>$t(12,562) = -5.73$<br>$p_{\text{uncorr}} = 1.03 \times 10^{-8}$ | 0.007 [-0.017, 0.031]<br>$t(12,562) = 0.61$<br>$p_{\text{uncorr}} = 5.42 \times 10^{-1}$    | -0.035* [-0.059, -0.011]<br>$t(12,562) = -2.91$<br>$p_{\text{uncorr}} = 3.62 \times 10^{-3}$  | -0.095** [-0.12, -0.071]<br>$t(12,562) = -7.74$<br>$p_{\text{uncorr}} = 1.07 \times 10^{-14}$  |
| <b>Ventroanterior Insula (l)</b> | -0.065** [-0.09, -0.041]<br>$t(12,562) = -5.24$<br>$p_{\text{uncorr}} = 1.65 \times 10^{-7}$   | -0.07** [-0.094, -0.047]<br>$t(12,562) = -5.85$<br>$p_{\text{uncorr}} = 4.93 \times 10^{-9}$  | 0.026 [0.001, 0.05]<br>$t(12,562) = 2.08$<br>$p_{\text{uncorr}} = 3.79 \times 10^{-2}$      | -0.019 [-0.043, 0.005]<br>$t(12,562) = -1.56$<br>$p_{\text{uncorr}} = 1.19 \times 10^{-1}$    | -0.097** [-0.122, -0.072]<br>$t(12,562) = -7.74$<br>$p_{\text{uncorr}} = 1.11 \times 10^{-14}$ |
| <b>Planum Polare (l)</b>         | -0.043** [-0.063, -0.022]<br>$t(12,562) = -4.13$<br>$p_{\text{uncorr}} = 3.68 \times 10^{-5}$  | -0.054** [-0.073, -0.034]<br>$t(12,562) = -5.42$<br>$p_{\text{uncorr}} = 5.96 \times 10^{-8}$ | 0.009 [-0.011, 0.029]<br>$t(12,562) = 0.9$<br>$p_{\text{uncorr}} = 3.68 \times 10^{-1}$     | -0.014 [-0.034, 0.006]<br>$t(12,562) = -1.36$<br>$p_{\text{uncorr}} = 1.75 \times 10^{-1}$    | -0.05** [-0.07, -0.029]<br>$t(12,562) = -4.78$<br>$p_{\text{uncorr}} = 1.74 \times 10^{-6}$    |

**Supplementary Table 7** | Effect sizes (standardized betas) and the corresponding 95% confidence intervals (uncorrected) of the associations between risky behaviour and grey matter volume in 23 ROIs, with and without controlling for current drinking level (binned in deciles) and current smoking level (binned in 3 categories). Both models include all of our standard controls ( $N = 12,675$ ). \*FWE-rate of 5 %; \*\*FWE-rate of 1%.

| ROI                    | Risky behaviour<br>(with drinking/smoking controls)                                 | Risky behaviour<br>(with standard controls)                                          |
|------------------------|-------------------------------------------------------------------------------------|--------------------------------------------------------------------------------------|
| vmPFC (l)              | -0.015 [-0.036, 0.005]<br>$t(12,551) = -1.45$ $p_{uncorr} = 0.15$                   | -0.056** [-0.08, -0.031]<br>$t(12,562) = -4.44$ $p_{uncorr} = 8.88 \times 10^{-6}$   |
| dIPFC (r) (BA46)       | -0.029 [-0.047, -0.012]<br>$t(12,551) = -3.32$ $p_{uncorr} = 9.03 \times 10^{-4}$   | -0.065** [-0.086, -0.044]<br>$t(12,562) = -6.15$ $p_{uncorr} = 7.91 \times 10^{-10}$ |
| dIPFC (l) (BA46)       | -0.016 [-0.033, 0.002]<br>$t(12,551) = -1.76$ $p_{uncorr} = 7.83 \times 10^{-2}$    | -0.048** [-0.069, -0.027]<br>$t(12,562) = -4.44$ $p_{uncorr} = 8.96 \times 10^{-6}$  |
| Precentral Gyrus (r)   | -0.017 [-0.034, 0.001]<br>$t(12,551) = -1.85$ $p_{uncorr} = 6.4 \times 10^{-2}$     | -0.061** [-0.082, -0.04]<br>$t(12,562) = -5.65$ $p_{uncorr} = 1.6 \times 10^{-8}$    |
| Cuneal Cortex (l)      | -0.012 [-0.028, 0.004]<br>$t(12,551) = -1.49$ $p_{uncorr} = 0.14$                   | -0.038** [-0.057, -0.02]<br>$t(12,562) = -4$ $p_{uncorr} = 6.48 \times 10^{-5}$      |
| Hypothalamus           | -0.017 [-0.034, 0.001]<br>$t(12,551) = -1.88$ $p_{uncorr} = 6.05 \times 10^{-2}$    | -0.068** [-0.089, -0.047]<br>$t(12,562) = -6.41$ $p_{uncorr} = 1.53 \times 10^{-10}$ |
| Putamen (l)            | -0.034** [-0.049, -0.019]<br>$t(12,551) = -4.46$ $p_{uncorr} = 8.15 \times 10^{-6}$ | -0.061** [-0.079, -0.043]<br>$t(12,562) = -6.67$ $p_{uncorr} = 2.69 \times 10^{-11}$ |
| Putamen (r)            | -0.031** [-0.046, -0.016]<br>$t(12,551) = -4.09$ $p_{uncorr} = 4.39 \times 10^{-5}$ | -0.055** [-0.073, -0.037]<br>$t(12,562) = -5.98$ $p_{uncorr} = 2.34 \times 10^{-9}$  |
| Amygdala (l)           | -0.041** [-0.059, -0.023]<br>$t(12,551) = -4.4$ $p_{uncorr} = 1.1 \times 10^{-5}$   | -0.072** [-0.094, -0.051]<br>$t(12,562) = -6.54$ $p_{uncorr} = 6.34 \times 10^{-11}$ |
| Amygdala (r)           | -0.032 [-0.05, -0.013]<br>$t(12,551) = -3.39$ $p_{uncorr} = 6.95 \times 10^{-4}$    | -0.073** [-0.095, -0.051]<br>$t(12,562) = -6.58$ $p_{uncorr} = 4.85 \times 10^{-11}$ |
| Ventral Striatum (l)   | -0.032* [-0.049, -0.015]<br>$t(12,551) = -3.66$ $p_{uncorr} = 2.56 \times 10^{-4}$  | -0.048** [-0.068, -0.027]<br>$t(12,562) = -4.61$ $p_{uncorr} = 4.16 \times 10^{-6}$  |
| Ventral Striatum (r)   | -0.033* [-0.05, -0.016]<br>$t(12,551) = -3.79$ $p_{uncorr} = 1.53 \times 10^{-4}$   | -0.053** [-0.074, -0.033]<br>$t(12,562) = -5.12$ $p_{uncorr} = 3.17 \times 10^{-7}$  |
| Brain-Stem             | -0.014 [-0.031, 0.002]<br>$t(12,551) = -1.71$ $p_{uncorr} = 8.73 \times 10^{-2}$    | -0.041** [-0.061, -0.022]<br>$t(12,562) = -4.15$ $p_{uncorr} = 3.4 \times 10^{-5}$   |
| Crus I Cerebellum (l)  | -0.017 [-0.033, -0.001]<br>$t(12,551) = -2.11$ $p_{uncorr} = 3.45 \times 10^{-2}$   | -0.04** [-0.059, -0.02]<br>$t(12,562) = -4.05$ $p_{uncorr} = 5.2 \times 10^{-5}$     |
| Crus II Cerebellum (l) | -0.027 [-0.043, -0.011]<br>$t(12,551) = -3.39$ $p_{uncorr} = 6.98 \times 10^{-4}$   | -0.038** [-0.057, -0.02]<br>$t(12,562) = -4$ $p_{uncorr} = 6.45 \times 10^{-5}$      |
| VIIb Cerebellum (l)    | -0.035** [-0.05, -0.02]<br>$t(12,551) = -4.44$ $p_{uncorr} = 9.08 \times 10^{-6}$   | -0.054** [-0.072, -0.035]<br>$t(12,562) = -5.72$ $p_{uncorr} = 1.12 \times 10^{-8}$  |
| VIIb Cerebellum (r)    | -0.03* [-0.045, -0.014]<br>$t(12,551) = -3.75$ $p_{uncorr} = 1.76 \times 10^{-4}$   | -0.042** [-0.06, -0.023]<br>$t(12,562) = -4.4$ $p_{uncorr} = 1.08 \times 10^{-5}$    |
| VIIIa Cerebellum (l)   | -0.031** [-0.047, -0.016]<br>$t(12,551) = -3.94$ $p_{uncorr} = 8.26 \times 10^{-5}$ | -0.05** [-0.069, -0.032]<br>$t(12,562) = -5.31$ $p_{uncorr} = 1.13 \times 10^{-7}$   |

|                                  |                                                                                     |                                                                                      |
|----------------------------------|-------------------------------------------------------------------------------------|--------------------------------------------------------------------------------------|
| <b>VIIa Cerebellum (r)</b>       | -0.033** [-0.048, -0.018]<br>$t(12,551) = -4.21$ $p_{uncorr} = 2.63 \times 10^{-5}$ | -0.048** [-0.067, -0.03]<br>$t(12,562) = -5.13$ $p_{uncorr} = 2.99 \times 10^{-7}$   |
| <b>IX Cerebellum (r)</b>         | -0.023 [-0.038, -0.008]<br>$t(12,551) = -3.04$ $p_{uncorr} = 2.4 \times 10^{-3}$    | -0.036** [-0.054, -0.018]<br>$t(12,562) = -3.92$ $p_{uncorr} = 8.93 \times 10^{-5}$  |
| <b>Ventroanterior Insula (r)</b> | -0.033 [-0.053, -0.013]<br>$t(12,551) = -3.21$ $p_{uncorr} = 1.32 \times 10^{-3}$   | -0.079** [-0.103, -0.055]<br>$t(12,562) = -6.43$ $p_{uncorr} = 1.34 \times 10^{-10}$ |
| <b>Ventroanterior Insula (l)</b> | -0.018 [-0.039, 0.002]<br>$t(12,551) = -1.76$ $p_{uncorr} = 7.79 \times 10^{-2}$    | -0.065** [-0.09, -0.041]<br>$t(12,562) = -5.24$ $p_{uncorr} = 1.65 \times 10^{-7}$   |
| <b>Planum Polare (l)</b>         | -0.011 [-0.028, 0.006]<br>$t(12,551) = -1.24$ $p_{uncorr} = 0.22$                   | -0.043** [-0.063, -0.022]<br>$t(12,562) = -4.13$ $p_{uncorr} = 3.68 \times 10^{-5}$  |

**Supplementary Table 8** | Effect sizes (standardized betas) and the corresponding 95% confidence intervals (uncorrected) of the associations between risky behaviour and ROI-level imaging-derived phenotypes (IDPs) of grey matter volume (GMV) in the replication sample ( $N = 13,004$ ) and original sample ( $N=12,675$ ). All beta coefficients are consistently negative across samples and 21 of 23 ROIs identified in the original analysis replicate (corrected for multiple testing using a permutation test, see Methods). \*FWE-rate of 5%; \*\*FWE-rate of 1%.

| ROI                    | Risky behaviour<br>(Replication Sample)                                              | Risky behaviour<br>(Original Sample)                                                 |
|------------------------|--------------------------------------------------------------------------------------|--------------------------------------------------------------------------------------|
| vmPFC (l)              | -0.101** [-0.125, -0.077]<br>$t(12,892) = -8.24$ $p_{uncorr} = 1.89 \times 10^{-16}$ | -0.056** [-0.08, -0.031]<br>$t(12,562) = -4.44$ $p_{uncorr} = 8.88 \times 10^{-6}$   |
| dIPFC (r) (BA46)       | -0.067** [-0.087, -0.046]<br>$t(12,892) = -6.37$ $p_{uncorr} = 2.02 \times 10^{-10}$ | -0.065** [-0.086, -0.044]<br>$t(12,562) = -6.15$ $p_{uncorr} = 7.91 \times 10^{-10}$ |
| dIPFC (l) (BA46)       | -0.051** [-0.072, -0.03]<br>$t(12,892) = -4.81$ $p_{uncorr} = 1.53 \times 10^{-6}$   | -0.048** [-0.069, -0.027]<br>$t(12,562) = -4.44$ $p_{uncorr} = 8.96 \times 10^{-6}$  |
| Precentral Gyrus (r)   | -0.073** [-0.094, -0.053]<br>$t(12,892) = -7.03$ $p_{uncorr} = 2.17 \times 10^{-12}$ | -0.061** [-0.082, -0.04]<br>$t(12,562) = -5.65$ $p_{uncorr} = 1.6 \times 10^{-8}$    |
| Cuneal Cortex (l)      | -0.02 [-0.038, -0.001]<br>$t(12,892) = -2.08$ $p_{uncorr} = 3.73 \times 10^{-2}$     | -0.038** [-0.057, -0.02]<br>$t(12,562) = -4$ $p_{uncorr} = 6.48 \times 10^{-5}$      |
| Hypothalamus           | -0.094** [-0.115, -0.074]<br>$t(12,892) = -8.87$ $p_{uncorr} = 8.21 \times 10^{-19}$ | -0.068** [-0.089, -0.047]<br>$t(12,562) = -6.41$ $p_{uncorr} = 1.53 \times 10^{-10}$ |
| Putamen (l)            | -0.039** [-0.056, -0.021]<br>$t(12,892) = -4.33$ $p_{uncorr} = 1.52 \times 10^{-5}$  | -0.061** [-0.079, -0.043]<br>$t(12,562) = -6.67$ $p_{uncorr} = 2.69 \times 10^{-11}$ |
| Putamen (r)            | -0.041** [-0.058, -0.023]<br>$t(12,892) = -4.49$ $p_{uncorr} = 7.06 \times 10^{-6}$  | -0.055** [-0.073, -0.037]<br>$t(12,562) = -5.98$ $p_{uncorr} = 2.34 \times 10^{-9}$  |
| Amygdala (l)           | -0.037** [-0.059, -0.016]<br>$t(12,892) = -3.41$ $p_{uncorr} = 6.52 \times 10^{-4}$  | -0.072** [-0.094, -0.051]<br>$t(12,562) = -6.54$ $p_{uncorr} = 6.34 \times 10^{-11}$ |
| Amygdala (r)           | -0.058** [-0.08, -0.036]<br>$t(12,892) = -5.25$ $p_{uncorr} = 1.54 \times 10^{-7}$   | -0.073** [-0.095, -0.051]<br>$t(12,562) = -6.58$ $p_{uncorr} = 4.85 \times 10^{-11}$ |
| Ventral Striatum (l)   | -0.045** [-0.066, -0.025]<br>$t(12,892) = -4.39$ $p_{uncorr} = 1.13 \times 10^{-5}$  | -0.048** [-0.068, -0.027]<br>$t(12,562) = -4.61$ $p_{uncorr} = 4.16 \times 10^{-6}$  |
| Ventral Striatum (r)   | -0.046** [-0.066, -0.025]<br>$t(12,892) = -4.41$ $p_{uncorr} = 1.02 \times 10^{-5}$  | -0.053** [-0.074, -0.033]<br>$t(12,562) = -5.12$ $p_{uncorr} = 3.17 \times 10^{-7}$  |
| Brain-Stem             | -0.056** [-0.075, -0.037]<br>$t(12,892) = -5.79$ $p_{uncorr} = 7.39 \times 10^{-9}$  | -0.041** [-0.061, -0.022]<br>$t(12,562) = -4.15$ $p_{uncorr} = 3.4 \times 10^{-5}$   |
| Crus I Cerebellum (l)  | -0.032** [-0.051, -0.013]<br>$t(12,892) = -3.33$ $p_{uncorr} = 8.81 \times 10^{-4}$  | -0.04** [-0.059, -0.02]<br>$t(12,562) = -4.05$ $p_{uncorr} = 5.2 \times 10^{-5}$     |
| Crus II Cerebellum (l) | -0.019 [-0.038, 0]<br>$t(12,892) = -2.01$ $p_{uncorr} = 4.47 \times 10^{-2}$         | -0.038** [-0.057, -0.02]<br>$t(12,562) = -4$ $p_{uncorr} = 6.45 \times 10^{-5}$      |
| VIIb Cerebellum (l)    | -0.039** [-0.057, -0.02]<br>$t(12,892) = -4.05$ $p_{uncorr} = 5.18 \times 10^{-5}$   | -0.054** [-0.072, -0.035]<br>$t(12,562) = -5.72$ $p_{uncorr} = 1.12 \times 10^{-8}$  |
| VIIb Cerebellum (r)    | -0.029* [-0.048, -0.01]<br>$t(12,892) = -3.02$ $p_{uncorr} = 2.54 \times 10^{-3}$    | -0.042** [-0.06, -0.023]<br>$t(12,562) = -4.4$ $p_{uncorr} = 1.08 \times 10^{-5}$    |



|                                  |                                                                                      |                                                                                      |
|----------------------------------|--------------------------------------------------------------------------------------|--------------------------------------------------------------------------------------|
| <b>VIIa Cerebellum (l)</b>       | -0.039** [-0.058, -0.02]<br>$t(12,892) = -3.98$ $p_{uncorr} = 7.02 \times 10^{-5}$   | -0.05** [-0.069, -0.032]<br>$t(12,562) = -5.31$ $p_{uncorr} = 1.13 \times 10^{-7}$   |
| <b>VIIa Cerebellum (r)</b>       | -0.048** [-0.067, -0.029]<br>$t(12,892) = -4.94$ $p_{uncorr} = 7.87 \times 10^{-7}$  | -0.048** [-0.067, -0.03]<br>$t(12,562) = -5.13$ $p_{uncorr} = 2.99 \times 10^{-7}$   |
| <b>IX Cerebellum (r)</b>         | -0.044** [-0.062, -0.026]<br>$t(12,892) = -4.78$ $p_{uncorr} = 1.75 \times 10^{-6}$  | -0.036** [-0.054, -0.018]<br>$t(12,562) = -3.92$ $p_{uncorr} = 8.93 \times 10^{-5}$  |
| <b>Ventroanterior Insula (r)</b> | -0.102** [-0.125, -0.078]<br>$t(12,892) = -8.53$ $p_{uncorr} = 1.56 \times 10^{-17}$ | -0.079** [-0.103, -0.055]<br>$t(12,562) = -6.43$ $p_{uncorr} = 1.34 \times 10^{-10}$ |
| <b>Ventroanterior Insula (l)</b> | -0.093** [-0.117, -0.069]<br>$t(12,892) = -7.6$ $p_{uncorr} = 3.08 \times 10^{-14}$  | -0.065** [-0.09, -0.041]<br>$t(12,562) = -5.24$ $p_{uncorr} = 1.65 \times 10^{-7}$   |
| <b>Planum Polare (l)</b>         | -0.058** [-0.078, -0.038]<br>$t(12,892) = -5.7$ $p_{uncorr} = 1.26 \times 10^{-8}$   | -0.043** [-0.063, -0.022]<br>$t(12,562) = -4.13$ $p_{uncorr} = 3.68 \times 10^{-5}$  |

**Supplementary Table 9** | Summary of studies used for the meta-analysis of fMRI studies on risky behaviours (provided by Neurosynth). Neurosynth uses text mining techniques to search through published articles for certain keywords (here: 'risky') and then quantifies how important the keyword is in any particular published article, relative to all other searched articles. Specifically, Neurosynth uses a metric (i.e. 'loading') to quantify how often the key word (here: 'risky') was used in the respective article relative to all other articles in this meta-analysis. Its value ranges from 0 to 1 and increases proportionally with the number of times a word appears in the respective published article. Neurosynth typically uses a cutoff of .05 for articles to be included in the meta-analysis. For further information see ref 32.

| <b>Title</b>                                                                                     | <b>Author</b>                                                                                                      | <b>Journal</b> | <b>Loading</b> | <b>Sample Size (after exclusions)</b> |
|--------------------------------------------------------------------------------------------------|--------------------------------------------------------------------------------------------------------------------|----------------|----------------|---------------------------------------|
| Adolescents' Neural Processing of Risky Decisions: Effects of Sex and behavioural Disinhibition. | Crowley TJ, Dalwani MS, Mikulich-Gilbertson SK, Young SE, Sakai JT, Raymond KM, McWilliams SK, Roark MJ, Banich MT | PloS one       | 0.678          | 81                                    |
| Altered Functional Response to Risky Choice in HIV Infection.                                    | Connolly CG, Bischoff-Grethe A, Jordan SJ, Woods SP, Ellis RJ, Paulus MP, Grant I                                  | PloS one       | 0.622          | 40                                    |
| Attenuated Neural Processing of Risk in Young Adults at Risk for Stimulant Dependence.           | Reske M, Stewart JL, Flagan TM, Paulus MP                                                                          | PloS one       | 0.576          | 208                                   |

|                                                                                                            |                                                                                                                  |                                      |       |     |
|------------------------------------------------------------------------------------------------------------|------------------------------------------------------------------------------------------------------------------|--------------------------------------|-------|-----|
| Learning from other people's experience: a neuroimaging study of decisional interactive-learning.          | Canessa N, Motterlini M, Alemanno F, Perani D, Cappa SF                                                          | NeuroImage                           | 0.564 | 24  |
| Children's brain activation during risky decision-making: A contributor to substance problems?             | Crowley TJ, Dalwani MS, Sakai JT, Raymond KM, McWilliams SK, Banich MT, Mikulich-Gilbertson SK                   | Drug and alcohol dependence          | 0.52  | 58  |
| Differences in neural activation as a function of risk-taking task parameters.                             | Congdon E, Bato AA, Schonberg T, Mumford JA, Karlsgodt KH, Sabb FW, London ED, Cannon TD, Bilder RM, Poldrack RA | Frontiers in neuroscience            | 0.49  | 23  |
| Are risky choices actually guided by a compensatory process? New insights from FMRI.                       | Rao LL, Zhou Y, Xu L, Liang ZY, Jiang T, Li S                                                                    | PloS one                             | 0.442 | 23  |
| Neural mechanisms of risky decision making in adolescents reporting frequent alcohol and/or marijuana use. | Claus ED, Feldstein Ewing SW, Magnan RE, Montanaro E, Hutchison KE, Bryan AD                                     | Brain imaging and behaviour          | 0.435 | 189 |
| Neural mechanisms of impulse control in sexually risky adolescents.                                        | Goldenberg D, Telzer EH, Lieberman MD, Fuligni A, Galvan A                                                       | Developmental cognitive neuroscience | 0.429 | 20  |

|                                                                                                                  |                                                                                                                |                                   |       |     |
|------------------------------------------------------------------------------------------------------------------|----------------------------------------------------------------------------------------------------------------|-----------------------------------|-------|-----|
| Neural Mechanisms Underlying Risk and Ambiguity Attitudes.                                                       | Blankenstein NE, Peper JS, Crone EA, van Duijvenvoorde ACK                                                     | Journal of cognitive neuroscience | 0.414 | 50  |
| Neural correlates of expected risks and returns in risky choice across development.                              | van Duijvenvoorde AC, Huizenga HM, Somerville LH, Delgado MR, Powers A, Weeda WD, Casey BJ, Weber EU, Figner B | Journal of neuroscience :         | 0.397 | 72  |
| Learning to play it safe (or not): stable and evolving neural responses during adolescent risky decision-making. | Kahn LE, Peake SJ, Dishion TJ, Stormshak EA, Pfeifer JH                                                        | Journal of cognitive neuroscience | 0.392 | 20  |
| Risky decisions and their consequences: neural processing by boys with Antisocial Substance Disorder.            | Crowley TJ, Dalwani MS, Mikulich-Gilbertson SK, Du YP, Lejuez CW, Raymond KM, Banich MT                        | PloS one                          | 0.381 | 40  |
| Adolescent neural response to reward is related to participant sex and task motivation.                          | Alarcon G, Cservenka A, Nagel BJ                                                                               | Brain and cognition               | 0.38  | 167 |
| The neural basis of social tactics: An fMRI study.                                                               | Fukui H, Murai T, Shinozaki J, Aso T, Fukuyama H, Hayashi T, Hanakawa T                                        | NeuroImage                        | 0.353 | 16  |
| Neural mechanisms underlying urgent and evaluative behaviours: An fMRI study on                                  | Megias A, Navas JF, Petrova D, Candido A, Maldonado A, Garcia-                                                 | Human brain mapping               | 0.348 | 57  |

|                                                                                                                           |                                                                                   |                                             |       |    |
|---------------------------------------------------------------------------------------------------------------------------|-----------------------------------------------------------------------------------|---------------------------------------------|-------|----|
| the interaction of automatic and controlled processes.                                                                    | Retamero R, Catena A                                                              |                                             |       |    |
| Acute stress increases risky decisions and dampens prefrontal activation among adolescent boys.                           | Uy JP, Galvan A                                                                   | NeuroImage                                  | 0.343 | 44 |
| Is payoff necessarily weighted by probability when making a risky choice? Evidence from functional connectivity analysis. | Rao LL, Li S, Jiang T, Zhou Y                                                     | PloS one                                    | 0.335 | 18 |
| The neural substrates of probabilistic and intertemporal decision making.                                                 | Weber BJ, Huettel SA                                                              | Brain research                              | 0.333 | 23 |
| Age-related differences in neural activities during risk taking as revealed by functional MRI.                            | Lee TM, Leung AW, Fox PT, Gao JH, Chan CC                                         | Social cognitive and affective neuroscience | 0.323 | 21 |
| Neural mechanisms of risky decision-making and reward response in adolescent onset cannabis use disorder.                 | De Bellis MD, Wang L, Bergman SR, Yaxley RH, Hooper SR, Huettel SA                | Drug and alcohol dependence                 | 0.321 | 56 |
| A cross-sectional and longitudinal analysis of reward-related brain activation: effects of age, pubertal stage, and       | van Duijvenvoorde AC, Op de Macks ZA, Overgaauw S, Gunther Moor B, Dahl RE, Crone | Brain and cognition                         | 0.319 | 33 |

|                                                                                                                          |                                                                                                               |                                          |       |    |
|--------------------------------------------------------------------------------------------------------------------------|---------------------------------------------------------------------------------------------------------------|------------------------------------------|-------|----|
| reward sensitivity.                                                                                                      | EA                                                                                                            |                                          |       |    |
| Effects of outcome on the covariance between risk level and brain activity in adolescents with internet gaming disorder. | Qi X, Yang Y, Dai S, Gao P, Du X, Zhang Y, Du G, Li X, Zhang Q                                                | NeuroImage. Clinical                     | 0.316 | 48 |
| Risky decision making and the anterior cingulate cortex in abstinent drug abusers and nonusers.                          | Fishbein DH, Eldreth DL, Hyde C, Matochik JA, London ED, Contoreggi C, Kurian V, Kimes AS, Breeden A, Grant S | Brain research. Cognitive brain research | 0.313 | 27 |
| Neural mechanisms underlying context-dependent shifts in risk preferences.                                               | Losecaat Vermeer AB, Boksem MA, Sanfey AG                                                                     | NeuroImage                               | 0.307 | 26 |
| An event-related fMRI study on risk taking by healthy individuals of high or low impulsiveness.                          | Lee TM, Chan CC, Han SH, Leung AW, Fox PT, Gao JH                                                             | Neuroscience letters                     | 0.295 | 18 |
| Neural responses to emotional stimuli are associated with childhood family stress.                                       | Taylor SE, Eisenberger NI, Saxbe D, Lehman BJ, Lieberman MD                                                   | Biological psychiatry                    | 0.291 | 30 |
| Neural correlates of Machiavellian strategies in a social dilemma task.                                                  | Bereczkei T, Deak A, Papp P, Perlaki G, Orsi G                                                                | Brain and cognition                      | 0.276 | 27 |
| Sex-related differences in                                                                                               | Lee TM, Chan CC, Leung                                                                                        | Cerebral                                 | 0.272 | 22 |

|                                                                                                       |                                                                   |                                   |       |    |
|-------------------------------------------------------------------------------------------------------|-------------------------------------------------------------------|-----------------------------------|-------|----|
| neural activity during risk taking: an fMRI study.                                                    | AW, Fox PT, Gao JH                                                | cortex (New York, N.Y. : 1991)    |       |    |
| Neurocognitive mechanisms underlying identification of environmental risks.                           | Qin J, Han S                                                      | Neuropsychologia                  | 0.249 | 14 |
| Neural representation of subjective value under risk and ambiguity.                                   | Levy I, Snell J, Nelson AJ, Rustichini A, Glimcher PW             | Journal of neurophysiology        | 0.238 | 29 |
| The influence of emotion regulation on decision-making under risk.                                    | Martin LN, Delgado MR                                             | Journal of cognitive neuroscience | 0.238 | 30 |
| Failure to retreat: Blunted sensitivity to negative feedback supports risky behaviour in adolescents. | McCormick EM, Telzer EH                                           | NeuroImage                        | 0.235 | 58 |
| Pre-existing brain states predict risky choices.                                                      | Huang YF, Soon CS, Mullette-Gillman OA, Hsieh PJ                  | NeuroImage                        | 0.234 | 14 |
| Greater risk sensitivity of dorsolateral prefrontal cortex in young smokers than in nonsmokers.       | Galvan A, Schonberg T, Mumford J, Kohno M, Poldrack RA, London ED | Psychopharmacology                | 0.232 | 43 |
| Neuronal Correlates of Risk-Seeking Attitudes to                                                      | Worbe Y, Irvine M, Lange I, Kundu P, Howell NA,                   | Biological psychiatry             | 0.231 | 42 |

|                                                                                                                                               |                                                                         |                                             |       |     |
|-----------------------------------------------------------------------------------------------------------------------------------------------|-------------------------------------------------------------------------|---------------------------------------------|-------|-----|
| Anticipated Losses in Binge Drinkers.                                                                                                         | Harrison NA, Bullmore ET, Robbins TW, Voon V                            |                                             |       |     |
| Age differences in the impact of peers on adolescents' and adults' neural response to reward.                                                 | Smith AR, Steinberg L, Strang N, Chein J                                | Developmental cognitive neuroscience        | 0.228 | 40  |
| Mothers know best: redirecting adolescent reward sensitivity toward safe behaviour during risk taking.                                        | Telzer EH, Ichien NT, Qu Y                                              | Social cognitive and affective neuroscience | 0.206 | 25  |
| Neural substrates of choice selection in adults and adolescents: development of the ventrolateral prefrontal and anterior cingulate cortices. | Eshel N, Nelson EE, Blair RJ, Pine DS, Ernst M                          | Neuropsychologia                            | 0.202 | 30  |
| The neural correlates of risk propensity in males and females using resting-state fMRI.                                                       | Zhou Y, Li S, Dunn J, Li H, Qin W, Zhu M, Rao LL, Song M, Yu C, Jiang T | Frontiers in behavioural neuroscience       | 0.198 | 289 |
| Influence of dorsolateral prefrontal cortex and ventral striatum on risk avoidance in addiction: a mediation analysis.                        | Yamamoto DJ, Woo CW, Wager TD, Regner MF, Tanabe J                      | Drug and alcohol dependence                 | 0.193 | 80  |
| Lorazepam dose-dependently decreases risk-taking related                                                                                      | Arce E, Miller DA, Feinstein JS, Stein MB,                              | Psychopharmacology                          | 0.192 | 15  |



|                                                                                                                                                        |                                                             |                                                                                 |       |    |
|--------------------------------------------------------------------------------------------------------------------------------------------------------|-------------------------------------------------------------|---------------------------------------------------------------------------------|-------|----|
| activation in limbic areas.                                                                                                                            | Paulus MP                                                   |                                                                                 |       |    |
| Neural correlates of choice behaviour related to impulsivity and venturesomeness.                                                                      | Hinvest NS, Elliott R, McKie S, Anderson IM                 | Neuropsychologia                                                                | 0.188 | 34 |
| Risk-Taking behaviour in a Computerized Driving Task: Brain Activation Correlates of Decision-Making, Outcome, and Peer Influence in Male Adolescents. | Vorobyev V, Kwon MS, Moe D, Parkkola R, Hamalainen H        | PloS one                                                                        | 0.185 | 34 |
| Risk-taking and social exclusion in adolescence: neural mechanisms underlying peer influences on decision-making.                                      | Peake SJ, Dishion TJ, Stormshak EA, Moore WE, Pfeifer JH    | NeuroImage                                                                      | 0.183 | 27 |
| behavioural contagion during learning about another agent's risk-preferences acts on the neural representation of decision-risk.                       | Suzuki S, Jensen EL, Bossaerts P, O'Doherty JP              | Proceedings of the National Academy of Sciences of the United States of America | 0.178 | 24 |
| Functional and structural neural indices of risk aversion in obsessive-compulsive                                                                      | Admon R, Bleich-Cohen M, Weizmant R, Poyurovsky M, Faragian | Psychiatry research                                                             | 0.175 | 26 |

|                                                                                                                        |                                                                                                                       |                                   |       |    |
|------------------------------------------------------------------------------------------------------------------------|-----------------------------------------------------------------------------------------------------------------------|-----------------------------------|-------|----|
| disorder (OCD).                                                                                                        | S, Hendler T                                                                                                          |                                   |       |    |
| Neural correlates of increased risk-taking propensity in sleep-deprived people along with a changing risk level.       | Lei Y, Wang L, Chen P, Li Y, Han W, Ge M, Yang L, Chen S, Hu W, Wu X, Yang Z                                          | Brain imaging and behaviour       | 0.17  | 37 |
| Uncovering putative neural markers of risk avoidance.                                                                  | Roy AK, Gotimer K, Kelly AM, Castellanos FX, Milham MP, Ernst M                                                       | Neuropsychologia                  | 0.162 | 23 |
| Buffering social influence: neural correlates of response inhibition predict driving safety in the presence of a peer. | Cascio CN, Carp J, O'Donnell MB, Tinney FJ Jr, Bingham CR, Shope JT, Ouimet MC, Pradhan AK, Simons-Morton BG, Falk EB | Journal of cognitive neuroscience | 0.161 | 37 |
| Neural correlates of the impact of prior outcomes on subsequent monetary decision-making in frequent poker players.    | Brevers D, He Q, Xue G, Bechara A                                                                                     | Biological psychology             | 0.161 | 28 |
| Decision-making under risk: an fMRI study.                                                                             | Hewig J, Straube T, Trippe RH, Kretschmer N, Hecht H, Coles MG, Miltner WH                                            | Journal of cognitive neuroscience | 0.158 | 17 |
| Imbalanced neural responsivity to risk and reward indicates                                                            | Admon R, Lubin G, Rosenblatt JD, Stern O,                                                                             | Cerebral cortex (New              | 0.156 | 24 |

|                                                                                                                                                        |                                                                                                                    |                             |       |    |
|--------------------------------------------------------------------------------------------------------------------------------------------------------|--------------------------------------------------------------------------------------------------------------------|-----------------------------|-------|----|
| stress vulnerability in humans.                                                                                                                        | Kahn I, Assaf M, Hendler T                                                                                         | York, N.Y. :<br>1991)       |       |    |
| Neural signatures of economic parameters during decision-making: a functional MRI (fMRI), electroencephalography (EEG) and autonomic monitoring study. | Minati L, Grisoli M, Franceschetti S, Epifani F, Granvillano A, Medford N, Harrison NA, Piacentini S, Critchley HD | Brain topography            | 0.152 | 22 |
| Individual differences in risk preference predict neural responses during financial decision-making.                                                   | Engelmann JB, Tamir D                                                                                              | Brain research              | 0.151 | 10 |
| Orbitofrontal reward sensitivity and impulsivity in adult attention deficit hyperactivity disorder.                                                    | Wilbertz G, van Elst LT, Delgado MR, Maier S, Feige B, Philippsen A, Blechert J                                    | NeuroImage                  | 0.149 | 56 |
| A preliminary study of longitudinal neuroadaptation associated with recovery from addiction.                                                           | Forster SE, Finn PR, Brown JW                                                                                      | Drug and alcohol dependence | 0.148 | 21 |
| Neural correlates of anticipation risk reflect risk preferences.                                                                                       | Rudorf S, Preuschoff K, Weber B                                                                                    | Journal of neuroscience     | 0.147 | 56 |
| behavioural and neural correlates of loss aversion and                                                                                                 | Barkley-Levenson EE, Van Leijenhorst L, Galvan                                                                     | Developmental cognitive     | 0.146 | 34 |

|                                                                                                                |                                                                                                                     |                             |       |    |
|----------------------------------------------------------------------------------------------------------------|---------------------------------------------------------------------------------------------------------------------|-----------------------------|-------|----|
| risk avoidance in adolescents and adults.                                                                      | A                                                                                                                   | neuroscience                |       |    |
| Dopamine agonists and risk: impulse control disorders in Parkinson's disease.                                  | Voon V, Gao J, Brezing C, Symmonds M, Ekanayake V, Fernandez H, Dolan RJ, Hallett M                                 | Brain                       | 0.142 | 44 |
| Neural signatures of economic preferences for risk and ambiguity.                                              | Huettel SA, Stowe CJ, Gordon EM, Warner BT, Platt ML                                                                | Neuron                      | 0.126 | 13 |
| Reduced cortical gray matter volume in male adolescents with substance and conduct problems.                   | Dalwani M, Sakai JT, Mikulich-Gilbertson SK, Tanabe J, Raymond K, McWilliams SK, Thompson LL, Banich MT, Crowley TJ | Drug and alcohol dependence | 0.122 | 44 |
| fMRI evidence for strategic decision-making during resolution of pronoun reference.                            | McMillan CT, Clark R, Gunawardena D, Ryant N, Grossman M                                                            | Neuropsychologia            | 0.12  | 16 |
| Entering adolescence: resistance to peer influence, risky behaviour, and neural changes in emotion reactivity. | Pfeifer JH, Masten CL, Moore WE 3rd, Oswald TM, Mazziotta JC, Iacoboni M, Dapretto M                                | Neuron                      | 0.118 | 38 |
| The neural basis of financial risk taking.                                                                     | Kuhnen CM, Knutson B                                                                                                | Neuron                      | 0.116 | 19 |

|                                                                                                                                                              |                                                                                                                  |                                                 |       |     |
|--------------------------------------------------------------------------------------------------------------------------------------------------------------|------------------------------------------------------------------------------------------------------------------|-------------------------------------------------|-------|-----|
| Variables influencing the neural correlates of perceived risk of physical harm.                                                                              | Coaster M, Rogers BP, Jones OD, Viscusi WK, Merkle KL, Zald DH, Gore JC                                          | Cognitive, affective & behavioural neuroscience | 0.116 | 19  |
| Distinct encoding of risk and value in economic choice between multiple risky options.                                                                       | Wright ND, Symmonds M, Dolan RJ                                                                                  | NeuroImage                                      | 0.113 | 24  |
| Decreasing ventromedial prefrontal cortex deactivation in risky decision making after simulated microgravity: effects of -6 degrees head-down tilt bed rest. | Rao LL, Zhou Y, Liang ZY, Rao H, Zheng R, Sun Y, Tan C, Xiao Y, Tian ZQ, Chen XP, Wang CH, Bai YQ, Chen SG, Li S | Frontiers in behavioural neuroscience           | 0.112 | 16  |
| Adolescent neurodevelopment of cognitive control and risk-taking in negative family contexts.                                                                | McCormick EM, Qu Y, Telzer EH                                                                                    | NeuroImage                                      | 0.11  | 20  |
| Individual differences in risk-taking tendencies modulate the neural processing of risky and ambiguous decision-making in adolescence.                       | Blankenstein NE, Schreuders E, Peper JS, Crone EA, van Duijvenvoorde ACK                                         | NeuroImage                                      | 0.106 | 198 |
| Morphometric correlation of impulsivity in medial prefrontal cortex.                                                                                         | Cho SS, Pellecchia G, Aminian K, Ray N, Segura B, Obeso I, Strafella AP                                          | Brain topography                                | 0.104 | 34  |

|                                                                                                                                                                        |                                                                                     |                                   |       |     |
|------------------------------------------------------------------------------------------------------------------------------------------------------------------------|-------------------------------------------------------------------------------------|-----------------------------------|-------|-----|
| Processing of decision-making and social threat in patients with history of suicidal attempt: A neuroimaging replication study.                                        | Olie E, Ding Y, Le Bars E, de Champfleur NM, Mura T, Bonafe A, Courtet P, Jollant F | Psychiatry research               | 0.102 | 73  |
| Sleep deprivation is associated with attenuated parametric valuation and control signals in the midbrain during value-based decision making.                           | Menz MM, Buchel C, Peters J                                                         | Journal of neuroscience           | 0.101 | 22  |
| Adaptive Adolescent Flexibility: Neurodevelopment of Decision-making and Learning in a Risky Context.                                                                  | McCormick EM, Telzer EH                                                             | Journal of cognitive neuroscience | 0.1   | 77  |
| Decreased activation of lateral orbitofrontal cortex during risky choices under uncertainty is associated with disadvantageous decision-making and suicidal behaviour. | Jollant F, Lawrence NS, Olie E, O'Daly O, Malafosse A, Courtet P, Phillips ML       | NeuroImage                        | 0.096 | 40  |
| Nothing to lose: processing blindness to potential losses drives thrill and adventure seekers.                                                                         | Kruschwitz JD, Simmons AN, Flagan T, Paulus MP                                      | NeuroImage                        | 0.096 | 188 |
| How the risky features of previous selection affect                                                                                                                    | Dong G, Zhang Y, Xu J, Lin X, Du X                                                  | Frontiers in neuroscience         | 0.094 | 22  |

|                                                                                                                                              |                                                          |                             |       |    |
|----------------------------------------------------------------------------------------------------------------------------------------------|----------------------------------------------------------|-----------------------------|-------|----|
| subsequent decision-making: evidence from behavioural and fMRI measures.                                                                     |                                                          |                             |       |    |
| Individualized relapse prediction: Personality measures and striatal and insular activity during reward-processing robustly predict relapse. | Gowin JL, Ball TM, Wittmann M, Tapert SF, Paulus MP      | Drug and alcohol dependence | 0.09  | 68 |
| Reduced posterior mesofrontal cortex activation by risky rewards in substance-dependent patients.                                            | Bjork JM, Momenan R, Smith AR, Hommer DW                 | Drug and alcohol dependence | 0.089 | 34 |
| Neural prediction errors reveal a risk-sensitive reinforcement-learning process in the human brain.                                          | Niv Y, Edlund JA, Dayan P, O'Doherty JP                  | Journal of neuroscience     | 0.089 | 16 |
| Increased activation in the right insula during risk-taking decision making is related to harm avoidance and neuroticism.                    | Paulus MP, Rogalsky C, Simmons A, Feinstein JS, Stein MB | NeuroImage                  | 0.087 | 17 |
| Neural activities underlying environmental and personal risk identification tasks.                                                           | Qin J, Lee TM, Wang F, Mao L, Han S                      | Neuroscience letters        | 0.086 | 14 |
| The Effect of Wealth Shocks                                                                                                                  | Pammi VSC, Ruiz S, Lee                                   | Frontiers in                | 0.086 | 15 |

|                                                                                                                                    |                                                                                                 |                                             |       |    |
|------------------------------------------------------------------------------------------------------------------------------------|-------------------------------------------------------------------------------------------------|---------------------------------------------|-------|----|
| on Loss Aversion: behaviour and Neural Correlates.                                                                                 | S, Noussair CN, Sitaram R                                                                       | neuroscience                                |       |    |
| The functional and structural neural basis of individual differences in loss aversion.                                             | Canessa N, Crespi C, Motterlini M, Baud-Bovy G, Chierchia G, Pantaleo G, Tettamanti M, Cappa SF | Journal of neuroscience                     | 0.085 | 56 |
| Developmental continuity in reward-related enhancement of cognitive control.                                                       | Strang NM, Pollak SD                                                                            | Developmental cognitive neuroscience        | 0.085 | 65 |
| Aberrant neural signatures of decision-making: Pathological gamblers display cortico-striatal hypersensitivity to extreme gambles. | Gelskov SV, Madsen KH, Ramsøy TZ, Siebner HR                                                    | NeuroImage                                  | 0.085 | 29 |
| Neural activity associated with the passive prediction of ambiguity and risk for aversive events.                                  | Bach DR, Seymour B, Dolan RJ                                                                    | Journal of neuroscience                     | 0.084 | 20 |
| Gender differences in reward-related decision processing under stress.                                                             | Lighthall NR, Sakaki M, Vasunilashorn S, Nga L, Somayajula S, Chen EY, Samii N, Mather M        | Social cognitive and affective neuroscience | 0.083 | 47 |
| Parsing neural mechanisms of social and physical risk identifications.                                                             | Qin J, Han S                                                                                    | Human brain mapping                         | 0.082 | 14 |



|                                                                                                                                       |                                                                                                        |                                       |       |    |
|---------------------------------------------------------------------------------------------------------------------------------------|--------------------------------------------------------------------------------------------------------|---------------------------------------|-------|----|
| Too little, too late or too much, too early? Differential hemodynamics of response inhibition in high and low sensation seekers       | Collins HR, Corbly CR, Liu X, Kelly TH, Lynam D, Joseph JE                                             | Brain research                        | 0.082 | 40 |
| Stress and decision making: neural correlates of the interaction between stress, executive functions, and decision making under risk. | Gathmann B, Schulte FP, Maderwald S, Pawlikowski M, Starcke K, Schafer LC, Scholer T, Wolf OT, Brand M | Experimental brain research           | 0.08  | 33 |
| Comparing apples and oranges: using reward-specific and reward-general subjective value representation in the brain.                  | Levy DJ, Glimcher PW                                                                                   | Journal of neuroscience               | 0.077 | 19 |
| The effect of age on neural processing of pleasant soft touch stimuli.                                                                | May AC, Stewart JL, Tapert SF, Paulus MP                                                               | Frontiers in behavioural neuroscience | 0.076 | 58 |
| Reduced functional connectivity of fronto-parietal sustained attention networks in severe childhood abuse.                            | Hart H, Lim L, Mehta MA, Chatzieffraimidou A, Curtis C, Xu X, Breen G, Simmons A, Mirza K, Rubia K     | PloS one                              | 0.076 | 48 |
| Neural sensitivity to absolute and relative anticipated reward in adolescents.                                                        | Vaidya JG, Knutson B, O'Leary DS, Block RI, Magnotta V                                                 | PloS one                              | 0.075 | 36 |

|                                                                                                                           |                                                                                                             |                                      |       |    |
|---------------------------------------------------------------------------------------------------------------------------|-------------------------------------------------------------------------------------------------------------|--------------------------------------|-------|----|
| Serotonin 2A receptors contribute to the regulation of risk-averse decisions.                                             | Macoveanu J, Rowe JB, Hornboll B, Elliott R, Paulson OB, Knudsen GM, Siebner HR                             | NeuroImage                           | 0.075 | 20 |
| Neural correlates of stress and favorite-food cue exposure in adolescents: a functional magnetic resonance imaging study. | Hommer RE, Seo D, Lacadie CM, Chaplin TM, Mayes LC, Sinha R, Potenza MN                                     | Human brain mapping                  | 0.067 | 43 |
| The neural basis of social risky decision making in females with major depressive disorder.                               | Shao R, Zhang HJ, Lee TM                                                                                    | Neuropsychologia                     | 0.067 | 29 |
| Neural substrates of reward magnitude, probability, and risk during a wheel of fortune decision-making task.              | Smith BW, Mitchell DG, Hardin MG, Jazbec S, Fridberg D, Blair RJ, Ernst M                                   | NeuroImage                           | 0.064 | 25 |
| Heightened activity in social reward networks is associated with adolescents' risky sexual behaviours.                    | Eckstrand KL, Choukas-Bradley S, Mohanty A, Cross M, Allen NB, Silk JS, Jones NP, Forbes EE                 | Developmental cognitive neuroscience | 0.059 | 47 |
| Neural correlates of high-risk behaviour tendencies and impulsivity in an emotional Go/NoGo fMRI task.                    | Brown MR, Benoit JR, Juhas M, Lebel RM, MacKay M, Dametto E, Silverstone PH, Dolcos F, Dursun SM, Greenshaw | Frontiers in systems neuroscience    | 0.054 | 19 |

|  |    |  |  |  |
|--|----|--|--|--|
|  | AJ |  |  |  |
|--|----|--|--|--|

## Supplementary References

1. Linnér, R. K. et al. Genome-wide association analyses of risk tolerance and risky behaviors in over 1 million individuals identify hundreds of loci and shared genetic influences. *Nat. Genet.* **51**, 245–257 (2019).
2. Desiderato, L. L. & Crawford, H. J. Risky sexual behavior in college students: Relationships between number of sexual partners, disclosure of previous risky behavior, and alcohol use. *Journal of Youth and Adolescence* **24**, 55–68 (1995).
3. Mata, R., Frey, R., Richter, D., Schupp, J. & Hertwig, R. Risk Preference: A View from Psychology. *J. Econ. Perspect.* **32(2)**, 155–172 (2018).
4. Mata, R., Josef, A. K. & Hertwig, R. Propensity for Risk Taking Across the Life Span and Around the Globe. *Psychol. Sci.* **27(2)**, 231–243 (2016).
5. Lönnqvist, J., Verkasalo, M., Walkowitz, G. & Wichardt, P. C. Measuring individual risk attitudes in the lab: Task or ask? An empirical comparison. *Journal of Economic Behavior & Organization* **119**, 254–266 (2015).
6. Okbay, A. et al. Genome-wide association study identifies 74 loci associated with educational attainment. *Nature* **533**, 539–542 (2016).
7. Croson, R. & Gneezy, U. Gender Differences in Preferences. *J. Econ. Lit.* **47(2)**, 448–474 (2009).
8. Dohmen, T. et al. INDIVIDUAL RISK ATTITUDES: MEASUREMENT, DETERMINANTS, AND BEHAVIORAL CONSEQUENCES. *Journal of the European Economic Association* **9(3)**, 522–550 (2011).
9. Cardon, L. R. & Palmer, L. J. Population stratification and spurious allelic association. *Lancet* **361(9357)**, 598–604 (2003).
10. Fonov, V., Evans, A. C., Botteron, K., Almli, C. R., McKinstry, R. C., Collins, D. L., &

- Brain Development Cooperative Group. (2011). Unbiased average age-appropriate atlases for pediatric studies. *Neuroimage*, 54(1), 313-327.
11. Alfaro-Almagro, F. et al. Image processing and Quality Control for the first 10,000 brain imaging datasets from UK Biobank. *Neuroimage* **166**, 400–424 (2018).
  12. Sallet, J. et al. The organization of dorsal frontal cortex in humans and macaques. *J. Neurosci.* **33(30)**, 12255–12274 (2013).
  13. Neubert, F., Mars, R. B., Sallet, J. & Rushworth, M. F. S. Connectivity reveals relationship of brain areas for reward-guided learning and decision making in human and monkey frontal cortex. *Proc. Natl. Acad. Sci. U. S. A.* **112(20)**, E2695–E2704 (2015).
  14. Boorman, E. D., Behrens, T. E. J., Woolrich, M. W. & Rushworth, M. F. S. How Green Is the Grass on the Other Side? Frontopolar Cortex and the Evidence in Favor of Alternative Courses of Action. *Neuron* **62(5)**, 733–743 (2009).
  15. Lim, S., O’Doherty, J. P. & Rangel, A. The Decision Value Computations in the vmPFC and Striatum Use a Relative Value Code That is Guided by Visual Attention. *Journal of Neuroscience* **31(37)**, 13214–13223 (2011).
  16. Barron, H. C., Dolan, R. J. & Behrens, T. E. J. Online evaluation of novel choices by simultaneous representation of multiple memories. *Nature Neuroscience* **16**, 1492–1498 (2013).
  17. Kable, J. W. & Glimcher, P. W. The neural correlates of subjective value during intertemporal choice. *Nat. Neurosci.* **10**, 1625-1633 (2007).
  18. Ongur, D. & Price, J. L. The Organization of Networks within the Orbital and Medial Prefrontal Cortex of Rats, Monkeys and Humans. *Cerebral Cortex* **10(3)**, 206–219 (2000).

19. Pauli, W. M., Nili, A. N. & Tyszka, J. M. A high-resolution probabilistic in vivo atlas of human subcortical brain nuclei. *Sci. Data* **5**, 180063 (2018).
20. Poppenk, J., Evensmoen, H. R., Moscovitch, M. & Nadel, L. Long-axis specialization of the human hippocampus. *Trends Cogn. Sci.* **17(5)**, 230–240 (2013).
21. Chang, L. J., Yarkoni, T., Khaw, M. W. & Sanfey, A. G. Decoding the role of the insula in human cognition: functional parcellation and large-scale reverse inference. *Cereb. Cortex* **23(3)**, 739–749 (2013).
22. Manichaikul, A. et al. Robust relationship inference in genome-wide association studies. *Bioinformatics* **26(22)**, 2867–2873 (2010).
23. Loh, P. et al. Efficient Bayesian mixed-model analysis increases association power in large cohorts. *Nat. Genet.* **47**, 284–290 (2015).
24. Loh, P., Kichaev, G., Gazal, S., Schoech, A. P. & Price, A. L. Mixed-model association for biobank-scale datasets. *Nat. Genet.* **50**, 906–908 (2018).
25. International HapMap 3 Consortium et al. Integrating common and rare genetic variation in diverse human populations. *Nature* **467**, 52–58 (2010).
26. Bulik-Sullivan, B. et al. An atlas of genetic correlations across human diseases and traits. *Nat. Genet.* **47**, 1236–1241 (2015).
27. Watanabe, K. et al. A global overview of pleiotropy and genetic architecture in complex traits. *Nat. Genet.* **51**, 1339–1348 (2019).
28. Meddens, S. F. W. et al. Genomic analysis of diet composition finds novel loci and associations with health and lifestyle. *Molecular Psychiatry* (2020).
29. Owens, M. M. et al. Neuroanatomical foundations of delayed reward discounting decision making. *NeuroImage* **161**, 261–270 (2017).

30. Jung, W. H., Lee, S., Lerman, C. & Kable, J. W. Amygdala Functional and Structural Connectivity Predicts Individual Risk Tolerance. *Neuron* **98(2)**, 394–404.e4 (2018).
31. Hagler, D. J., Jr et al. Image processing and analysis methods for the Adolescent Brain Cognitive Development Study. *Neuroimage* **202**, 116091 (2019).
32. Yarkoni, T., Poldrack, R. A., Nichols, T. E., Van Essen, D. C. & Wager, T. D. Large-scale automated synthesis of human functional neuroimaging data. *Nat. Methods* **8**, 665–670 (2011).

## Supplementary Notes

### **BIG BEAR Consortium Members List (Alphabetical Order)**

**Nooshin Abbasi**

McConnell Brain Imaging Centre, Montreal Neurological Institute, McGill University, Montreal, QC, Canada

**Gökhan Aydogan**

Zurich Center for Neuroeconomics (ZNE), Department of Economics, University of Zurich, Zurich, Switzerland

**Danilo Bzdok**

Department of Biomedical Engineering, McConnell Brain Imaging Center (BIC), Montreal Neurological Institute (MNI), Faculty of Medicine, McGill University, Montreal, QC, Canada  
Mila – Quebec Artificial Intelligence Institute, Montreal, QC, Canada

**Alain Dagher**

McConnell Brain Imaging Centre, Montreal Neurological Institute, McGill University, Montreal, QC, Canada

**Remi Daviet**

Marketing Department, The Wharton School, University of Pennsylvania, Philadelphia, PA, USA

**Martha J. Farrah**

Department of Psychology, University of Pennsylvania, Philadelphia, PA, USA

**Todd A. Hare**

Zurich Center for Neuroeconomics (ZNE), Department of Economics, University of Zurich, Zurich, Switzerland

**Wi Hoon Jung**

Department of Psychology, Daegu University, Gyeongsan, South Korea

**Joseph W. Kable**

Department of Psychology, University of Pennsylvania, Philadelphia, PA, USA

**Richard Karlsson Linnér**

Department of Economics, School of Business and Economics, Vrije Universiteit Amsterdam, Amsterdam, the Netherlands

**Philipp D. Koellinger**

La Follette School of Public Affairs, University of Wisconsin-Madison, Madison, WI, USA  
Department of Economics, School of Business and Economics, Vrije Universiteit Amsterdam, Amsterdam, the Netherlands

**Henry R. Kranzler**

Department of Psychiatry, University of Pennsylvania Perelman School of Medicine, Philadelphia, PA, USA  
Veterans Integrated Service Network 4, Mental Illness Research, Education and Clinical Center, Crescenzo Veterans Affairs Medical Center, Philadelphia, PA, USA

**Hyeokmoon Kweon**

Department of Economics, School of Business and Economics, Vrije Universiteit Amsterdam, Amsterdam, the Netherlands

**Dylan Manfredi**

Marketing Department, The Wharton School, University of Pennsylvania, Philadelphia, PA, USA



**Gideon Nave**

Marketing Department, The Wharton School, University of Pennsylvania, Philadelphia, PA, USA

**Christian C. Ruff**

Zurich Center for Neuroeconomics (ZNE), Department of Economics, University of Zurich, Zurich, Switzerland

**Aldo Rustichini**

Department of Economics, University of Minnesota

**Reagan R. Wetherill**

Department of Psychiatry, University of Pennsylvania Perelman School of Medicine, Philadelphia, PA, USA
